# Supplementary material for: Practical copper(i)-catalysed amidation of aldehydes
Source: Royal Society of Chemistry journal article supplement (doi:10.1039/b918588g), 2009-12-04
Supplement: b918588g.pdf [file b918588g.pdf]

**Electronic Supplementary Information**  
**for**  
**Practical Copper(I)-Catalysed Amidation of Aldehydes**

Joyce Wei Wei Chang,<sup>a</sup> Thi My Uyen Ton,<sup>a</sup> Stefani Tania,<sup>a</sup> Paul C. Taylor\*<sup>b</sup> and Philip  
Wai Hong Chan\*<sup>a</sup>

*<sup>a</sup> Division of Chemistry and Biological Chemistry, School of Physical and  
Mathematical Sciences, Nanyang Technological University, Singapore  
637371, Singapore*

*<sup>b</sup> Department of Chemistry, University of Warwick, Coventry, CV47AL, U.K.*

**General Experimental Section:** All reactions were performed under a nitrogen atmosphere at ambient temperature unless otherwise stated.  $\text{PhI}=\text{NTs}$ ,<sup>S1</sup> the Schiff base ligands<sup>S2</sup> and  $\text{PhI}=\text{O}$ <sup>S3</sup> were prepared according to known literature procedures. Unless specified, all reagents and starting materials were purchased from commercial sources and used as received;  $\text{CH}_2\text{Cl}_2$  and MeCN were purified prior to use by distilling over  $\text{CaH}_2$ ; pyridine was distilled over KOH and benzaldehyde was distilled under reduced pressure. Analytical thin layer chromatography (TLC) was performed using Merck 60 F254 pre-coated silica gel plate. Visualization was achieved by UV-vis light (254 nm) followed by treatment with ninhydrin stain and heating. Flash chromatography was performed using Merck silica gel 60 using a gradient solvent system (EtOAc: *n*-hexane as eluant). Unless otherwise stated,  $^1\text{H}$  and  $^{13}\text{C}$  NMR spectra were measured on Bruker Avance 300 MHz spectrometer. Unless otherwise stated, chemical shifts (ppm) were recorded in  $\text{CDCl}_3$  solution with tetramethylsilane (TMS) as the internal reference standard. Low resolution mass spectra were determined on a Finnigan LCQ XP MAX mass spectrometer. High resolution mass spectra (HRMS) were obtained using Finnigan MAT95XP LC/HRMS. Kinetic isotope measurements were conducted on a Waters TQD with 0.1% formic acid in 95%  $\text{H}_2\text{O}$ :5% MeCN as the mobile phase.

**General Procedure for the Optimization of Copper-Catalysed Amidation of 1a to 2a with  $\text{PhI}=\text{NTs}$ :** To a suspension of the catalyst (0.05 mmol, 10 mol %),  $\text{PhI}=\text{NTs}$  (1 mmol, 2 equiv) and powdered 4Å molecular sieves in 2 mL of  $\text{CH}_2\text{Cl}_2$ , was added isovaleraldehyde **1a** (0.5 mmol, 1 equiv) under a  $\text{N}_2$  atmosphere. The reaction was stirred at room temperature for 18 h. On completion, the crude mixture was filtered through Celite®, washed with EtOAc, evaporated to dryness and purified by silica gel flash column chromatography (*n*-hexanes:EtOAc as eluant) to give the title compound.

**General Procedure for the Optimization of Copper + Ligand-Catalysed Amidation of 1a to 2a with  $\text{PhI}=\text{NTs}$ :** A suspension of the catalyst (0.05 mmol, 10 mol %), ligand (refer to Table 2) and powdered 4Å molecular sieves were stirred for 1 h in 2 mL of  $\text{CH}_2\text{Cl}_2$  under a  $\text{N}_2$  atmosphere. On completion,  $\text{PhI}=\text{NTs}$  (1 mmol, 2 equiv) and isovaleraldehyde **1a** (0.5 mmol, 1 equiv) were added. The reaction was stirred at room

temperature for a further 18 h, after which the crude mixture was filtered through Celite®, washed with EtOAc, evaporated to dryness and purified by silica gel flash column chromatography (*n*-hexanes:EtOAc as eluant) to give the title compound.

**General Procedure for the Optimization of Cu(I) + py-Catalysed Amidation of 1b to 2b with PhI=NTs:** A suspension of the catalyst (0.05 mmol, 10 mol %), pyridine (0.2 mmol, 40 mol %) and powdered 4Å molecular sieves were stirred for 1 h in 2 mL of CH<sub>2</sub>Cl<sub>2</sub> under a N<sub>2</sub> atmosphere. On completion, PhI=NTs (1 mmol, 2 equiv) and benzaldehyde **1b** (0.5 mmol, 1 equiv) were added. The reaction was stirred at room temperature for a further 18 h, after which the crude mixture was filtered through Celite®, washed with EtOAc, evaporated to dryness and purified by silica gel flash column chromatography (*n*-hexanes:EtOAc as eluant) to give the title compound.

**General Procedure for the CuI + py-Catalysed Amidation of Aldehydes with PhI=NTs:** A suspension of CuI (0.05 mmol, 10 mol %), pyridine (0.2 mmol, 40 mol %) and powdered 4Å molecular sieves were stirred for 1 h in 2 mL of CH<sub>2</sub>Cl<sub>2</sub> under a N<sub>2</sub> atmosphere. On completion, PhI=NTs (1 mmol, 2 equiv) was added and the aldehyde (0.5 mmol, 1 equiv) diluted in 1 mL of CH<sub>2</sub>Cl<sub>2</sub> was added into the reaction mixture over 2 h via a syringe pump. The reaction was stirred at room temperature for 16 h, after which the crude mixture was filtered through Celite®, washed with EtOAc, evaporated to dryness and purified by silica gel flash column chromatography (*n*-hexanes:EtOAc as eluant) to give the acylsulfonamide product.

**General Procedure for the CuCl-Catalysed Amidation of Aldehydes with TsNCINa.3H<sub>2</sub>O:** To a suspension of CuCl (0.05 mmol, 10 mol %) and TsNCINa.3H<sub>2</sub>O (1.3 mmol, 2.6 equiv) in 7.5 mL of MeCN was added the aldehyde (0.5 mmol, 1 equiv) under a N<sub>2</sub> atmosphere. The reaction was stirred at room temperature for 18 h. On completion, the crude mixture was filtered through a plug of silica gel, washed with EtOAc, evaporated to dryness and purified by silica gel flash column chromatography (*n*-hexanes:EtOAc as eluant) to give the acylsulfonamide product.

**Procedure for the Synthesis of 3b:**<sup>S4</sup> To a solution of benzaldehyde **1b** (10 mmol, 1 equiv) and *p*-toluenesulfonamide (10 mmol, 1 equiv) in 50 mL of CH<sub>2</sub>Cl<sub>2</sub> was added trifluoroacetic anhydride (11 mmol, 1.1 equiv). The reaction was refluxed for 12 h after which the reaction mixture was poured into cold water, extracted with CH<sub>2</sub>Cl<sub>2</sub>, dried with MgSO<sub>4</sub>, evaporated to dryness and purified by silica gel flash column chromatography (*n*-hexanes:EtOAc as eluant) to give the title compound as a white solid in 76% yield (2.28 g). <sup>1</sup>H NMR δ 9.03 (s, 1H) 7.94-7.88 (m, 4H), 7.62 (t, *J* = 6.18 Hz, 1H) 7.49 (d, *J* = 7.4 Hz, 2H), 7.36 (d, *J* = 8.1 Hz, 2H), 2.44 (s, 3H); <sup>13</sup>C NMR δ 170.1, 144.6, 134.9, 132.4, 131.3, 129.8, 129.1, 128.1, 126.4, 21.6; MS (EI) *m/z* 260 [M+H]<sup>+</sup>.

**Procedure for the Synthesis of 4b:**<sup>S5</sup> To a suspension of powdered KOH (7 mmol, 3.5 equiv) and *m*-chloroperoxybenzoic acid (2.2 mmol, 1.1 equiv) in 1 mL of CH<sub>2</sub>Cl<sub>2</sub> was added a solution of **3b** (2 mmol, 1 equiv) in 3 mL of CH<sub>2</sub>Cl<sub>2</sub>. After 5 min, the suspension was filtered, evaporated to dryness and dried under vacuum to afford the product as a white solid in 95% yield (528 mg). <sup>1</sup>H NMR δ 7.93 (d, *J* = 8.0 Hz, 2H), 7.46-7.40 (m, 7H), 5.45 (s, 1H), 2.49 (s, 3H); <sup>13</sup>C NMR δ 146.3, 131.5, 131.4, 130.5, 130.0, 129.4, 128.7, 128.2, 76.3, 21.8; MS (EI) *m/z* 276 [M+H]<sup>+</sup>.

**Procedure for the Synthesis of 5:**<sup>S6</sup> To a suspension of [Ru(TTP)CO] (0.2 mmol, 0.1 equiv) and PhI=NTs (3 mmol, 1.5 equiv) in 2 mL of CH<sub>2</sub>Cl<sub>2</sub> in the presence of powdered 4 Å molecular sieves was added pyridine (2 mmol, 1 equiv) under N<sub>2</sub> atmosphere. The reaction was stirred at 30 °C until completion based on TLC analysis, after which the reaction mixture was cooled to room temperature, filtered, evaporated to dryness and purified by silica gel flash column chromatography (CH<sub>2</sub>Cl<sub>2</sub>: acetone as eluant) to afford the product in 64% yield (320 mg). <sup>1</sup>H NMR δ 8.46 (d, *J* = 3.8 Hz, 2H), 7.97 (dt, *J* = 7.75, 1.05 Hz, 1H), 7.63-7.59 (m, 4H), 7.17 (d, *J* = 6.54 Hz, 2H), 2.36 (s, 3H); <sup>13</sup>C NMR δ 145.2, 141.6, 138.6, 129.2, 127.0, 126.7, 21.3; MS (EI) *m/z* 249 [M+H]<sup>+</sup>.

**General Procedure for the CuI + py-Catalysed Reaction of 3b or 4b:** A suspension of CuI (0.05 mmol, 10 mol %), pyridine (0.2 mmol, 40 mol %) and 4Å powdered molecular sieves were stirred for 1 h in 2 mL of CH<sub>2</sub>Cl<sub>2</sub> under a N<sub>2</sub> atmosphere. On completion, PhI=O or PhI(OAc)<sub>2</sub> (1 mmol, 2 equiv) and **3b** or **4b** (0.5 mmol, 1 equiv) was added. The reaction was stirred at room temperature for a further 18 h, after which the mixture was filtered through Celite®, washed with EtOAc and evaporated to dryness. The reaction mixture was then analysed by <sup>1</sup>H NMR spectroscopy and mass spectrometry.

**Procedure for the CuI + py-Catalysed Reaction of 1a with 5:** To a suspension of CuI (0.05 mmol, 10 mol %), **5** (1 mmol, 2 equiv) and 4Å powdered molecular sieves in 2 mL of CH<sub>2</sub>Cl<sub>2</sub>, was added **1a** (0.5 mmol, 1 equiv) under a N<sub>2</sub> atmosphere. The reaction was stirred at room temperature for 18 hr, after which the mixture was filtered through Celite®, washed with EtOAc and evaporated to dryness. The reaction mixture was then analysed by <sup>1</sup>H NMR spectroscopy and mass spectrometry.

**Procedure for the <sup>13</sup>C-Benzaldehyde *in situ* Monitoring Experiment:** To a suspension of CuI (0.01 mmol, 10 mol %) and 4Å powdered molecular sieves in CD<sub>2</sub>Cl<sub>2</sub> (2 mL) was added pyridine (0.4 mmol, 40 mol %). After stirring for 1 h, PhI=NTs (1 mmol, 2 equiv) was added. A solution of <sup>13</sup>C-benzaldehyde (0.5 mmol, 1 equiv) in CD<sub>2</sub>Cl<sub>2</sub> (1 mL) was added via syringe pump over 1 h. Upon completion of addition, an aliquot (100 uL) was diluted with CD<sub>2</sub>Cl<sub>2</sub> and monitored by NMR. Subsequent aliquots at 4, 10 and 18 h were obtained and subjected to <sup>13</sup>C NMR analysis.

**Procedure for the Deuterium Labeling Experiment: CuI + py-Catalyzed Amidation of Benzaldehyde- $\alpha$ -d<sub>1</sub> to N,N-d<sub>1</sub>-Tosylbenzamide with PhI=NTs:** To a suspension of CuI (0.025 mmol, 10 mol %), pyridine (0.1 mmol, 40 mol%) and PhI=NTs (0.5 mmol, 2 equiv) in 1 mL CH<sub>2</sub>Cl<sub>2</sub> or CD<sub>2</sub>Cl<sub>2</sub> was added  $\alpha$ -d<sub>1</sub>-benzaldehyde (0.25 mmol, 1 equiv) under a N<sub>2</sub> atmosphere. The reaction was left at room temperature for 18 h, after which a <sup>1</sup>H NMR and mass spectra of the reaction mixture was obtained.

**Procedure for the Kinetic Isotope Study:** To a suspension of CuI (0.025 mol, 10 mol %) and powdered 4Å molecular sieves in CH<sub>2</sub>Cl<sub>2</sub> (1 mL) was added pyridine (0.1 mmol, 40 mol %). After stirring for 1 h, PhI=NTs (0.25 mmol, 1 equiv) was added. A solution of benzaldehyde (0.3 mmol, 1.2 equiv) and *d*<sub>6</sub>-benzaldehyde (0.3 mmol, 1.2 equiv) in CH<sub>2</sub>Cl<sub>2</sub> (1 mL) was added via syringe pump over 1 h. After 18 h, the solution was assayed via LCMS.

**3-Methyl-*N*-tosylbutanamide 2a**<sup>S7</sup>

White solid; Yield: 97%; <sup>1</sup>H NMR δ 9.22 (bs, 1H), 7.96 (d, *J* = 8.1 Hz, 2H), 7.35 (d, *J* = 8.1 Hz, 2H), 2.45 (s, 3H), 2.13 (d, *J* = 6.5 Hz, 2H), 2.03-2.09 (m, 1H), 0.87 (d, *J* = 6.4 Hz, 2H); <sup>13</sup>C NMR δ 171.1, 145.2, 135.7, 129.7, 128.4, 45.3, 25.7, 22.3, 21.8; MS (EI) *m/z* 256 [M+H]<sup>+</sup>.

***N*-Tosylbenzamide 2b**<sup>S7</sup>

White solid; Yield: 83%; <sup>1</sup>H NMR δ 9.48 (bs, 1H), 8.05 (d, *J* = 8.4 Hz, 2H), 7.82 (d, *J* = 7.3 Hz, 2H), 7.56 (t, *J* = 7.2 Hz, 1H), 7.45 (t, *J* = 7.8 Hz, 2H), 7.34 (d, *J* = 8.3 Hz, 2H), 2.43 (s, 3H); <sup>13</sup>C NMR δ 164.4, 145.3, 135.6, 133.5, 131.2, 129.7, 129.0, 128.7, 128.0, 21.7; MS (EI) *m/z* 276 [M+H]<sup>+</sup>.

***N*-Tosylheptanamide 2c**<sup>S7</sup>

White solid; Yield: 95%; <sup>1</sup>H (500 MHz) NMR δ 8.80 (bs, 1H), 7.95 (d, *J* = 8.4 Hz, 2H), 7.35 (d, *J* = 8.2 Hz, 2H), 2.44 (s, 3H), 2.24 (t, *J* = 7.4 Hz, 2H) 1.54 (t, *J* = 6.1 Hz, 2H) 1.20-1.25 (m, 6H), 0.83 (t, *J* = 6.5 Hz, 3H); <sup>13</sup>C (125 MHz) δ 171.1, 145.2, 135.6, 129.7, 128.4, 36.3, 31.3, 28.5, 24.3, 22.4, 21.7, 14.0; MS (EI) *m/z* 271 [M+H]<sup>+</sup>.

***N*-Tosylpropionamide 2d**<sup>S7</sup>

White solid; Yield: 81 %; <sup>1</sup>H (500 MHz) NMR δ 9.00 (s, 1H), 7.96 (d, *J* = 8.4 Hz, 2H), 7.35 (d, *J* = 8.1 Hz, 2H), 2.44 (s, 3H), 2.30 (qt, *J* = 7.4 Hz, 2H) 1.07 (t, *J* = 7.4 Hz, 3H); <sup>13</sup>C (125 MHz) NMR δ 172.0, 145.2, 135.6, 129.7, 128.3, 29.5, 21.7, 8.2; MS (EI) *m/z* 228 [M+H]<sup>+</sup>.

***N*-Tosylisobutyramide 2e**<sup>S7</sup>

White solid; Yield: 81%; <sup>1</sup>H (400 MHz) NMR δ 8.86 (bs, 1H), 7.95 (d, *J* = 8.0 Hz, 2H), 7.34 (d, *J* = 8.0 Hz, 2H), 2.39-2.46 (m, 4H), 1.09 (d, *J* = 6.9 Hz, 6H); <sup>13</sup>C (100 MHz) NMR δ 175.0, 145.4, 135.7, 129.9, 128.6, 35.9, 22.0, 18.8; MS (EI) *m/z* 242 [M+H]<sup>+</sup>.

***N*-Tosylcyclopropanecarboxamide 2f<sup>S7</sup>**

White solid; Yield: 98 %; <sup>1</sup>H NMR δ 8.87 (bs, 1H), 7.94 (d, *J* = 8.1 Hz, 2H), 7.34 (d, *J* = 8.1 Hz, 2H), 2.44 (s, 3H), 1.55-1.50 (m, 1H), 1.00-1.02 (m, 2H), 0.85-0.87 (m, 2H); <sup>13</sup>C NMR δ 171.8, 145.1, 135.6, 129.6, 128.3, 21.7, 14.7, 9.6; MS (EI) *m/z* 240 [M+H]<sup>+</sup>.

***N*-Tosylcyclopentanecarboxamide 2g<sup>S7</sup>**

White solid; Yield: 96 %; <sup>1</sup>H NMR δ 9.11 (bs, 1H), 7.92 (d, *J* = 8.3 Hz, 2H), 7.30 (d, *J* = 8.2 Hz, 2H), 2.58-2.63 (m, 1H), 2.40 (s, 3H), 1.47-1.78 (m, 8H); <sup>13</sup>C NMR δ 174.0, 145.0, 135.7, 129.6, 128.3, 45.4, 29.5, 25.8, 21.7; MS (EI) *m/z* 268 [M+H]<sup>+</sup>.

***N*-Tosylcyclohexanecarboxamide 2h<sup>S7</sup>**

White solid; Yield: 96%; <sup>1</sup>H (500 MHz) NMR δ 8.54 (bs, 1H), 7.94 (d, *J* = 8.3 Hz, 2H), 7.34 (d, *J* = 8.2 Hz, 2H), 2.44 (s, 3H), 2.13 (tt, *J* = 11.6, 3.5 Hz, 1H), 1.81-1.71 (m, 4H), 1.62 (bd, *J* = 7.8 Hz, 1H), 1.38-1.12 (m, 5H); <sup>13</sup>C (125 MHz) δ 173.5, 145.0, 135.6, 129.6, 128.3, 45.1, 28.7, 25.4, 25.2, 21.7; MS (EI) *m/z* 282 [M+H]<sup>+</sup>.

**3-Methyl-*N*-tosylbut-2-enamide 2i<sup>S7</sup>**

White solid; Yield: 65%; <sup>1</sup>H NMR δ 8.50 (bs, 1H), 7.95 (d, *J* = 8.3 Hz, 2H), 7.32 (d, *J* = 8.1 Hz, 2H), 5.57 (s, 1H), 2.42 (s, 3H), 2.09 (s, 3H), 1.85 (s, 3H); <sup>13</sup>C NMR δ 163.4, 160.4, 144.8, 136.0, 129.6, 128.3, 115.5, 27.7, 21.7, 20.6; MS (EI) *m/z* 253 [M+H]<sup>+</sup>.

**(*E*)-*N*-tosylhex-2-enamide 2j<sup>S7</sup>**

Yellow oil; Yield: 62%; <sup>1</sup>H NMR δ 9.32 (bs, 1H), 7.97 (d, *J* = 8.2 Hz, 2H), 7.32 (d, *J* = 8.2 Hz, 2H), 6.98 (dt, *J* = 15.4, 7.0 Hz, 1H), 5.86 (d, *J* = 15.4 Hz, 1H), 2.42 (s, 3H), 2.15 (qt, *J* = 7.0 Hz, 2H), 1.37-1.44 (m, 2H), 0.86 (t, *J* = 7.36 Hz, 3H); <sup>13</sup>C NMR δ 163.4, 150.8, 144.9, 135.6, 129.5, 128.2, 121.2, 34.1, 21.5, 21.0, 13.5; MS (EI) *m/z* 278 [M+H]<sup>+</sup>.

**4-Bromo-*N*-tosylbenzamide 2k<sup>S7</sup>**

White solid; Yield: 64%; <sup>1</sup>H NMR δ 9.32 (bs, 1H), 8.02 (d, *J* = 8.3 Hz, 2H), 7.70 (d, *J* = 8.6 Hz, 2H), 7.54 (d, *J* = 8.6 Hz, 2H), 7.35 (d, *J* = 8.2 Hz, 2H), 2.44 (s, 3H); <sup>13</sup>C NMR δ



163.8, 163.3, 145.5, 135.3, 132.2, 130.0, 129.7, 129.5, 128.6, 21.7; MS (EI)  $m/z$  354 [M+H]<sup>+</sup>.

#### **4-Chloro-*N*-tosylbenzamide 2l**<sup>S7</sup>

White solid; Yield: 47%; <sup>1</sup>H NMR  $\delta$  9.43 (bs, 1H), 8.00 (d,  $J$  = 7.8 Hz, 2H), 7.76 (d,  $J$  = 8.1 Hz, 2H), 7.35-7.39 (m, 4H), 2.43 (s, 3H); <sup>13</sup>C NMR  $\delta$  163.5, 145.5, 140.0, 135.3, 129.7, 129.6, 129.3, 129.2, 128.7, 21.7; MS (EI)  $m/z$  310 [M+H]<sup>+</sup>.

#### **4-Methyl-*N*-tosylbenzamide 2m**<sup>S7</sup>

White solid; Yield: 93%; <sup>1</sup>H NMR  $\delta$  9.32 (bs, 1H), 8.06 (d,  $J$  = 8.2 Hz, 2H), 7.72 (d,  $J$  = 8.1 Hz, 2H), 7.35 (d,  $J$  = 8.0 Hz, 2H), 7.22 (d,  $J$  = 8.0 Hz, 2H), 2.44 (s, 3H), 2.39 (s, 3H); <sup>13</sup>C NMR  $\delta$  164.3, 145.1, 144.4, 135.6, 129.6, 128.6, 128.4, 127.9, 127.8, 21.7, 21.6 MS (EI)  $m/z$  290 [M+H]<sup>+</sup>.

#### **4-Methoxy-*N*-tosylbenzamide 2n**<sup>S7</sup>

White solid; Yield: 99%; <sup>1</sup>H NMR  $\delta$  9.14 (bs, 1H), 8.01 (d,  $J$  = 8.3 Hz, 2H), 7.76 (d,  $J$  = 8.9 Hz, 2H), 7.32 (d,  $J$  = 8.2 Hz, 2H), 6.87 (d,  $J$  = 8.8 Hz, 2H), 3.80 (s, 3H), 2.41 (s, 3H); <sup>13</sup>C NMR  $\delta$  163.7, 145.0, 135.6, 130.0, 129.5, 128.5, 126.4, 123.2, 114.1, 55.5, 21.6; MS (EI)  $m/z$  306 [M+H]<sup>+</sup>.

#### ***N*-Tosyl-1-naphthamide 2o**<sup>S7</sup>

White solid; Yield: 99%; <sup>1</sup>H NMR (400 MHz)  $\delta$  9.17 (bs, 1H), 8.15 (t,  $J$  = 3.4 Hz, 1H), 8.00 (t,  $J$  = 8.2 Hz, 2H), 7.87 (d,  $J$  = 8.2 Hz, 1H), 7.76-7.78 (m, 1H), 7.63 (d,  $J$  = 7.1 Hz, 1H), 7.42-7.48 (m, 2H), 7.29-7.36 (m, 3H), 2.41 (s, 3H); <sup>13</sup>C (100 MHz) NMR  $\delta$  166.2, 145.2, 135.5, 133.7, 132.9, 130.0, 129.8, 129.7, 128.6, 128.5, 127.9, 126.8, 124.9, 124.4, 21.7; MS (EI)  $m/z$  326 [M+H]<sup>+</sup>.

#### ***N*-Tosylfuran-2-carboxamide 2p**<sup>S7</sup>

White solid; Yield: 93%; <sup>1</sup>H (400 MHz) NMR  $\delta$  7.99 (d,  $J$  = 11.2 Hz, 2H), 7.55 (d,  $J$  = 1.2 Hz, 1H), 7.27 (d,  $J$  = 10.8 Hz, 2H), 7.21 (d,  $J$  = 4.7 Hz, 1H), 6.54 (t,  $J$  = 2.4 Hz, 1H),

2.36 (s, 3H);  $^{13}\text{C}$  (100 MHz) NMR  $\delta$  162.3, 154.3, 145.7, 145.3, 145.2, 135.5, 129.6, 128.6, 118.1, 113.1, 21.7; MS (EI)  $m/z$  266  $[\text{M}+\text{H}]^+$ .

**Figure S1.**  $^1\text{H}$  and  $^{13}\text{C}$  NMR spectra of **2a**<sup>S7</sup>

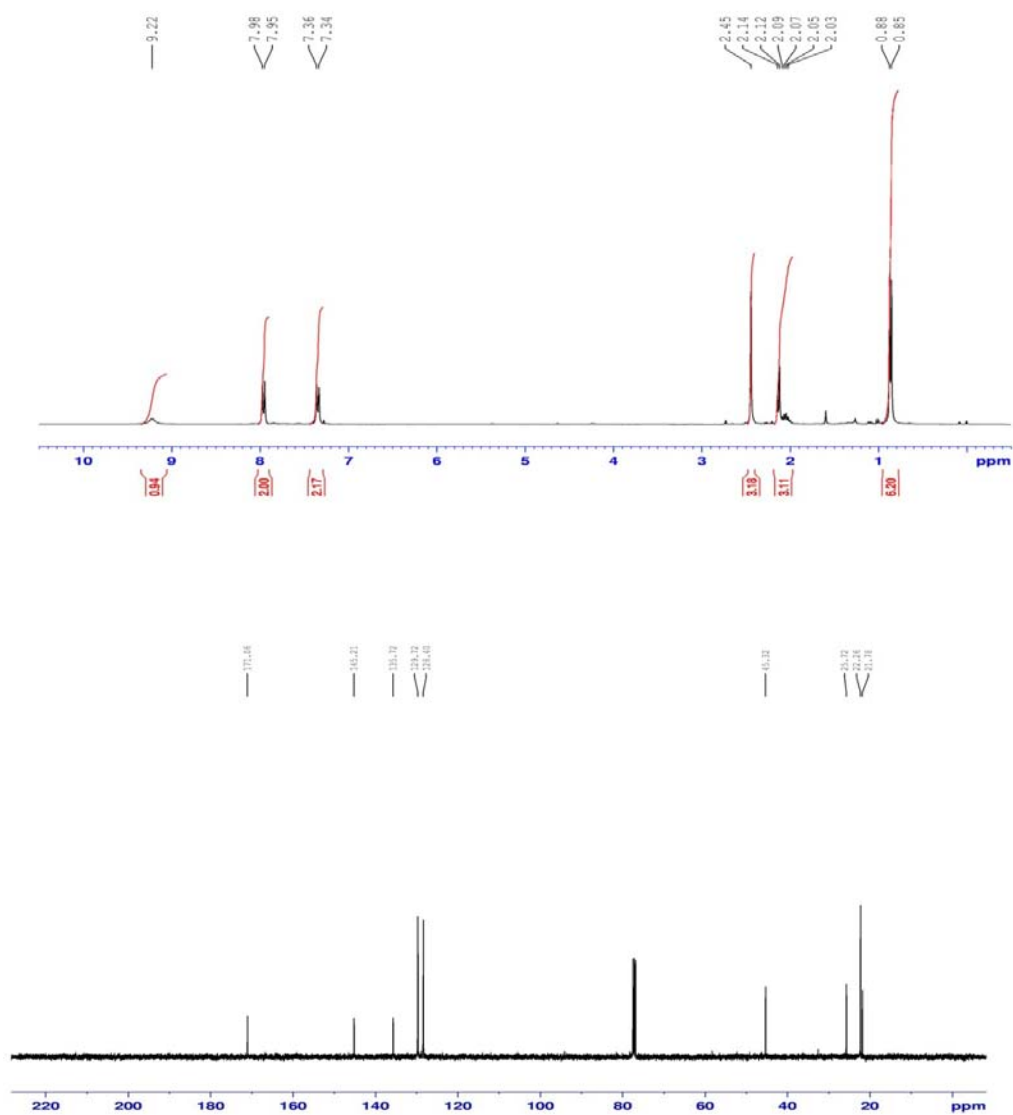

**Figure S2.**  $^1\text{H}$  and  $^{13}\text{C}$  NMR spectra of **2b**<sup>S7</sup>

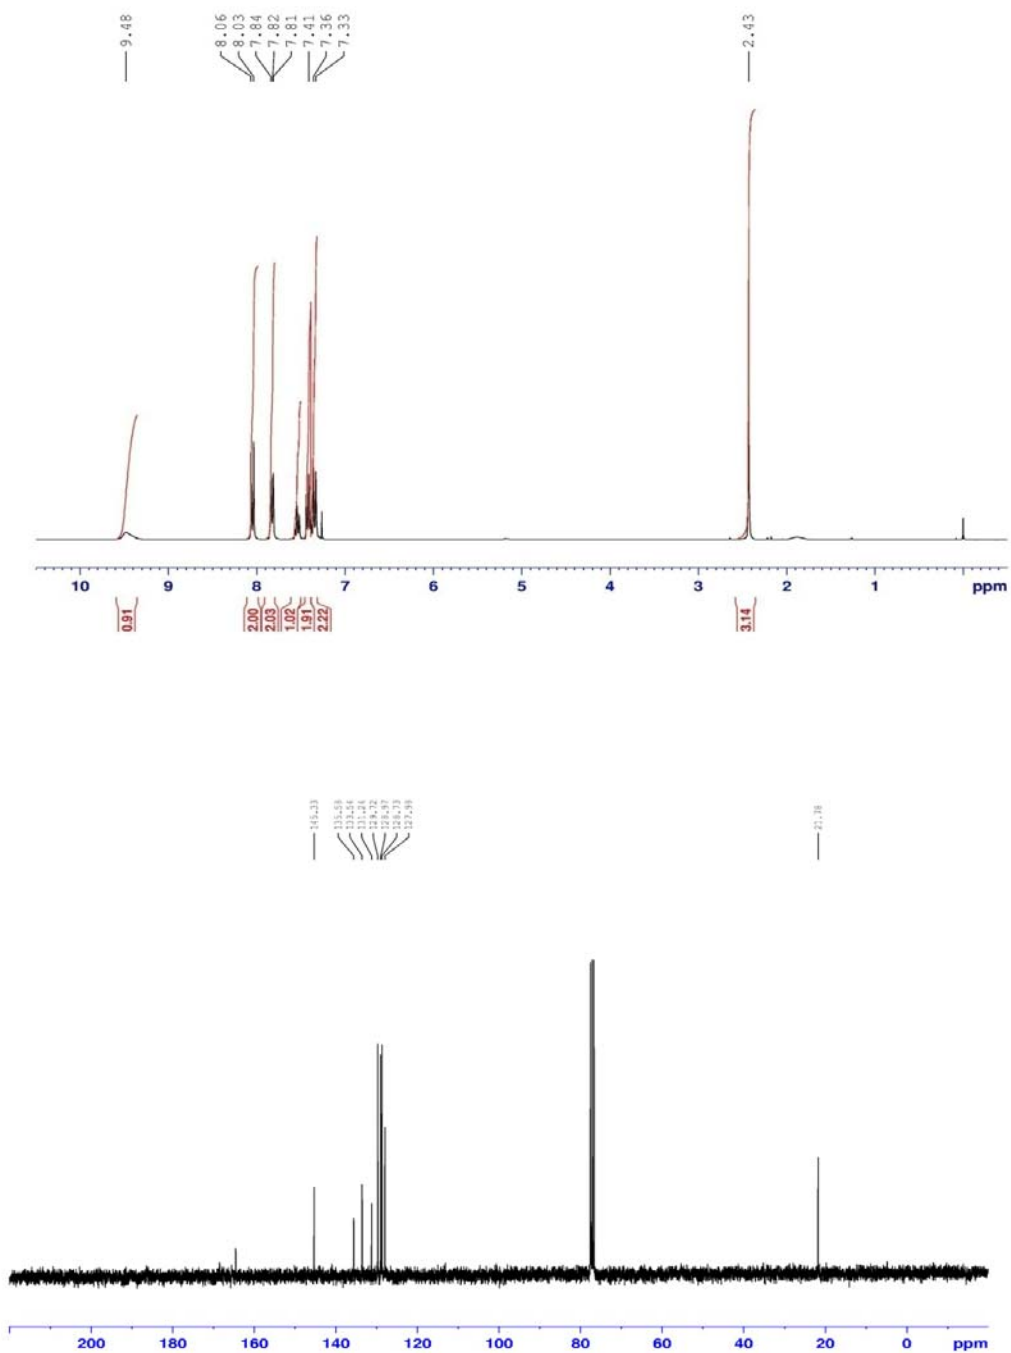

**Figure S3.**  $^1\text{H}$  and  $^{13}\text{C}$  NMR spectra of **2c**<sup>S7</sup>

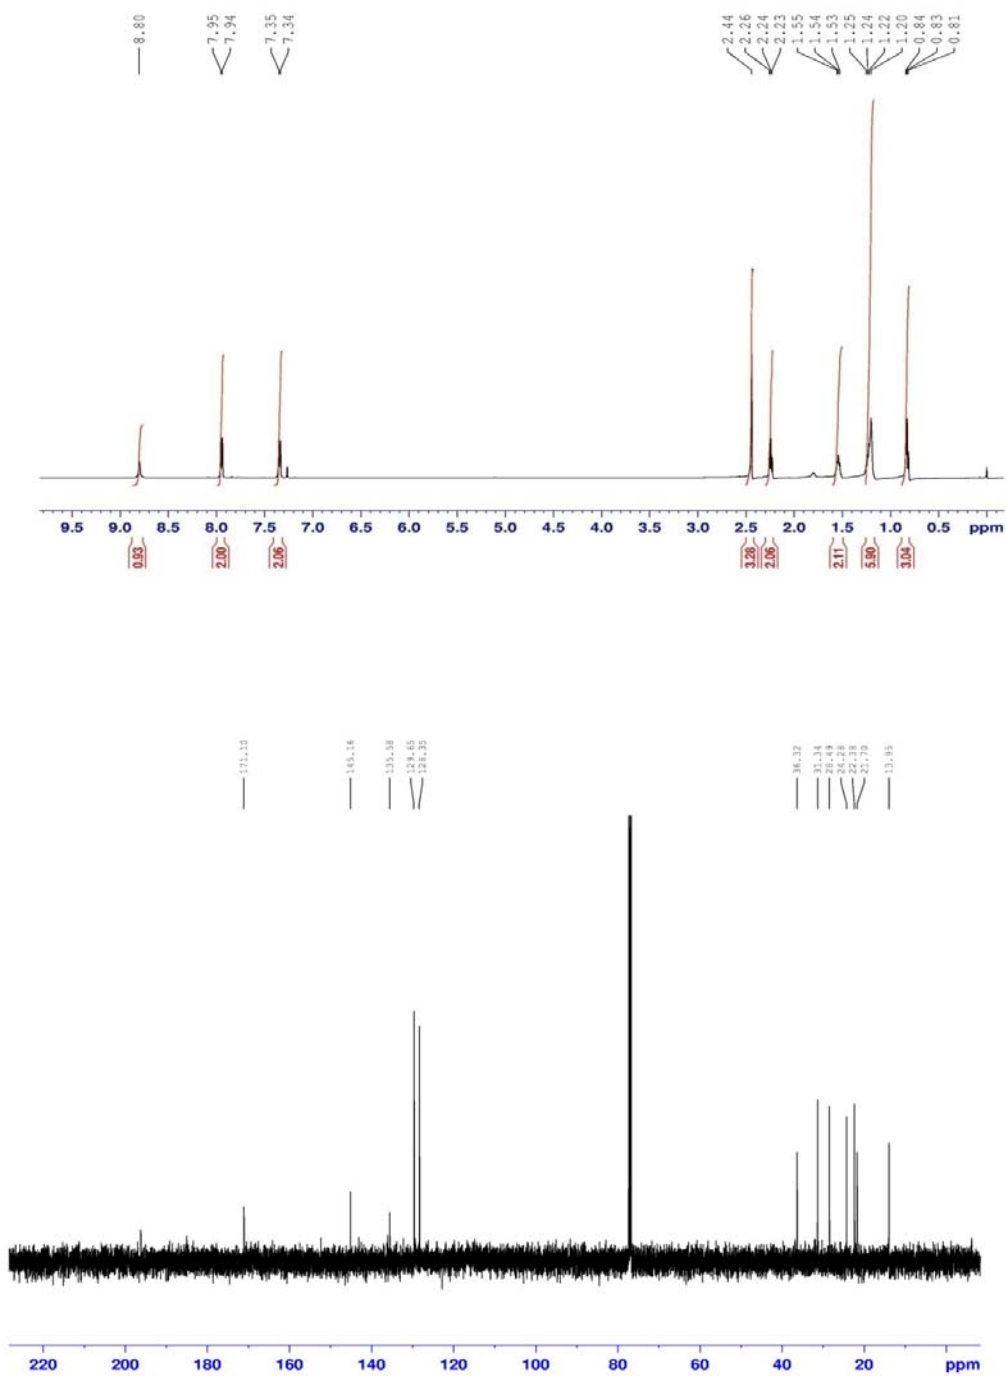

**Figure S4.**  $^1\text{H}$  and  $^{13}\text{C}$  NMR spectra of **2d**<sup>S7</sup>

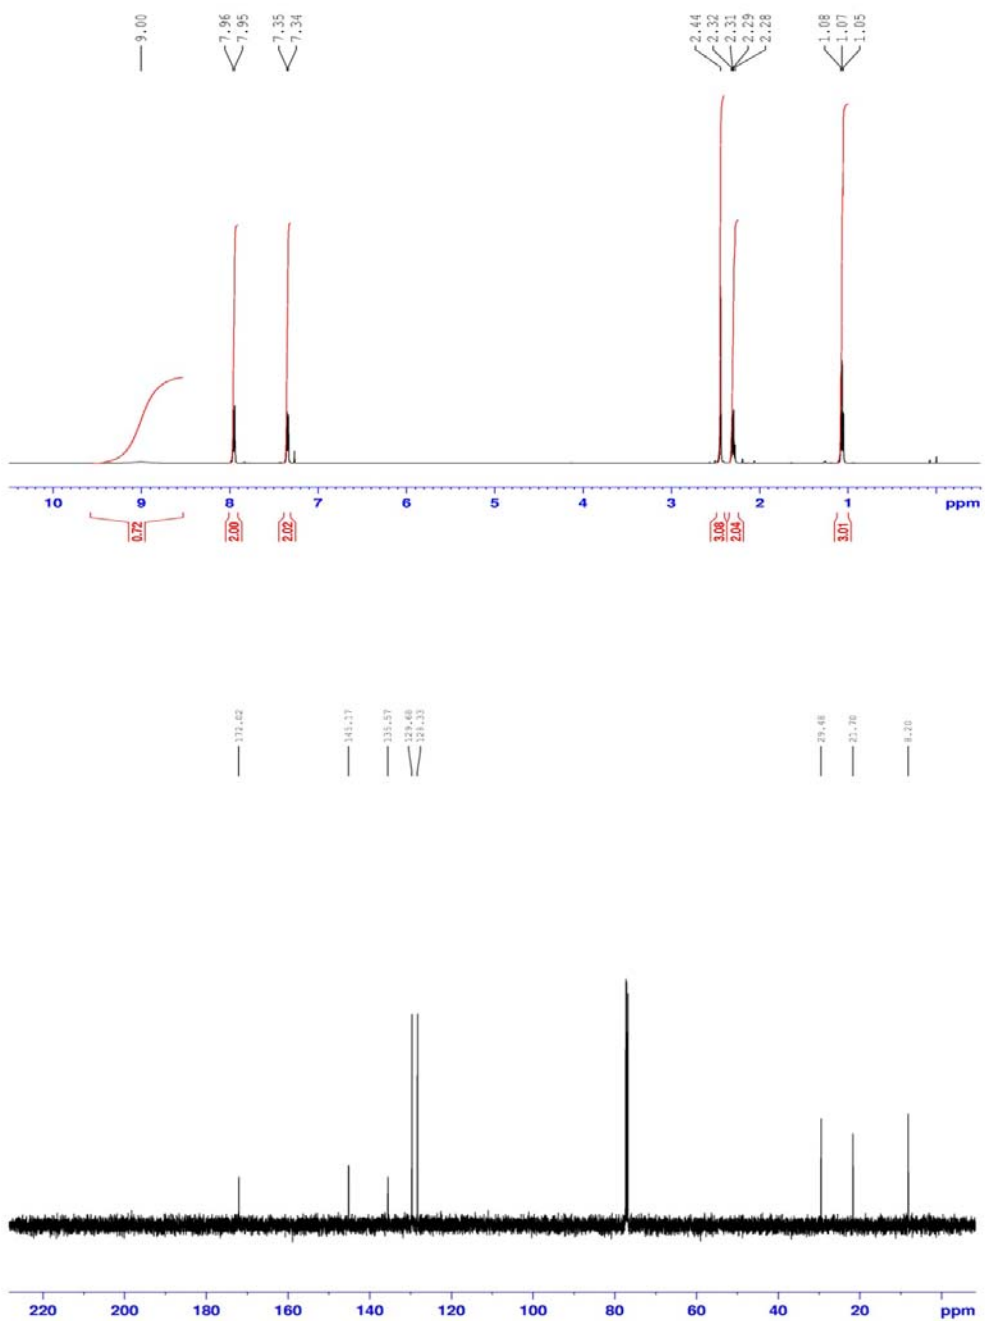

**Figure S5.**  $^1\text{H}$  and  $^{13}\text{C}$  NMR spectra of  $2\text{e}^{\text{S7}}$

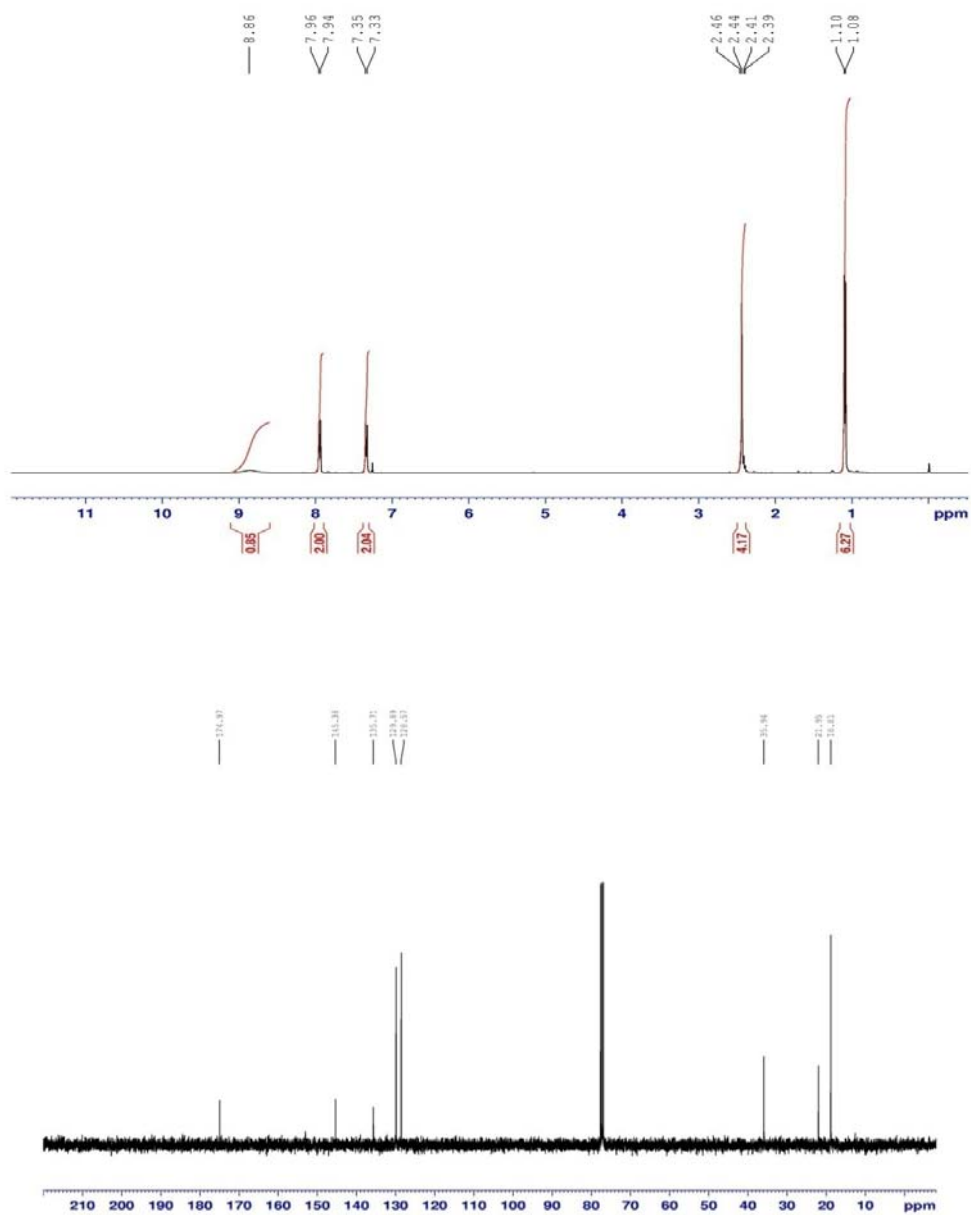

**Figure S6.**  $^1\text{H}$  and  $^{13}\text{C}$  NMR spectra of **2f**<sup>S7</sup>

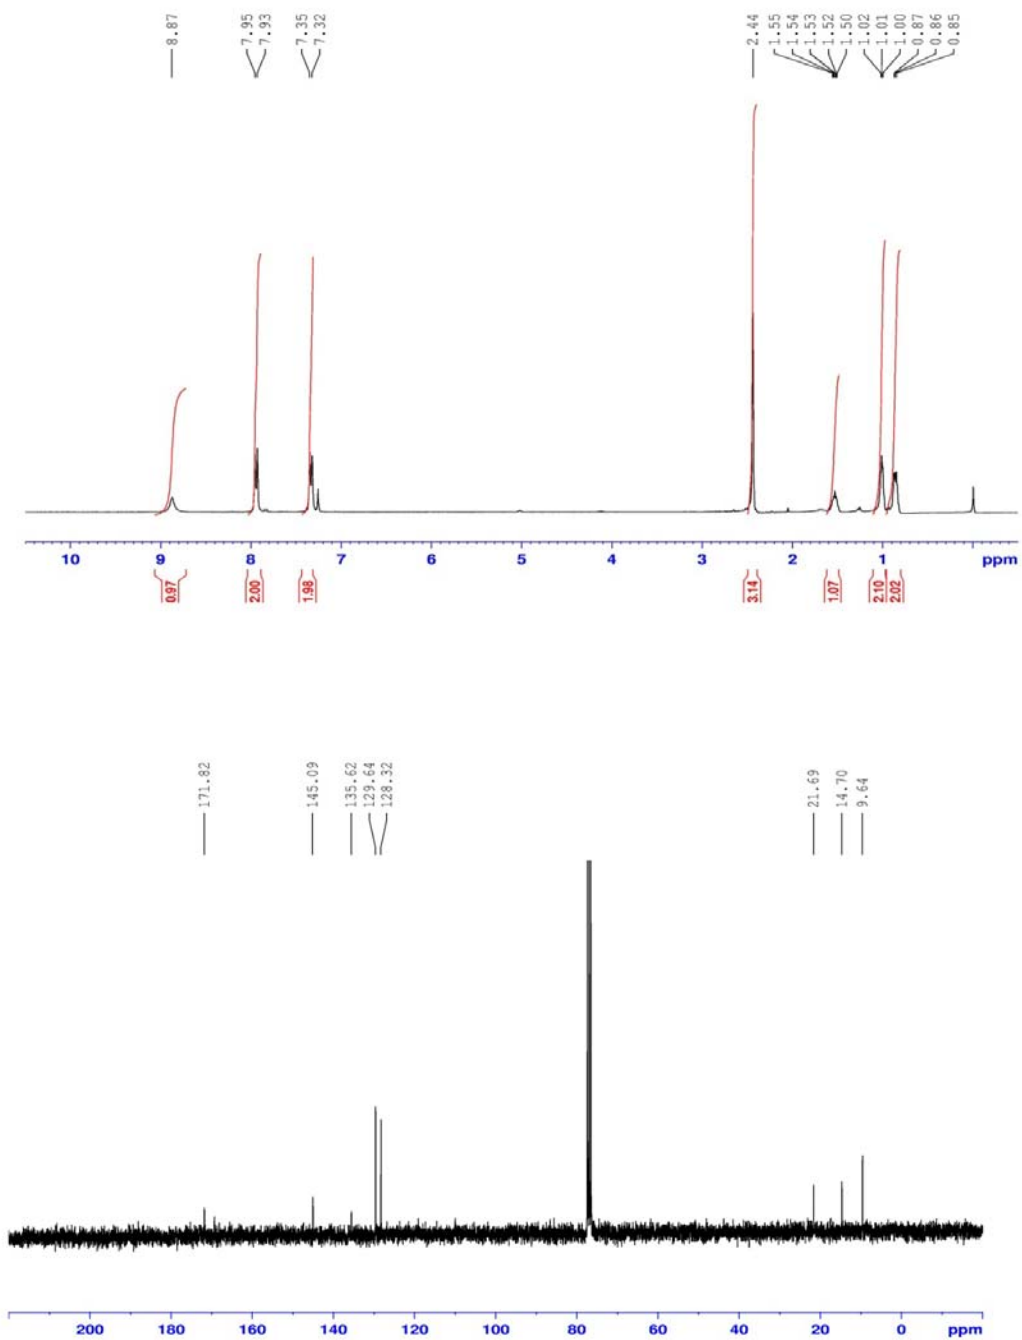



**Figure S7.**  $^1\text{H}$  and  $^{13}\text{C}$  NMR spectra of **2g**<sup>S7</sup>

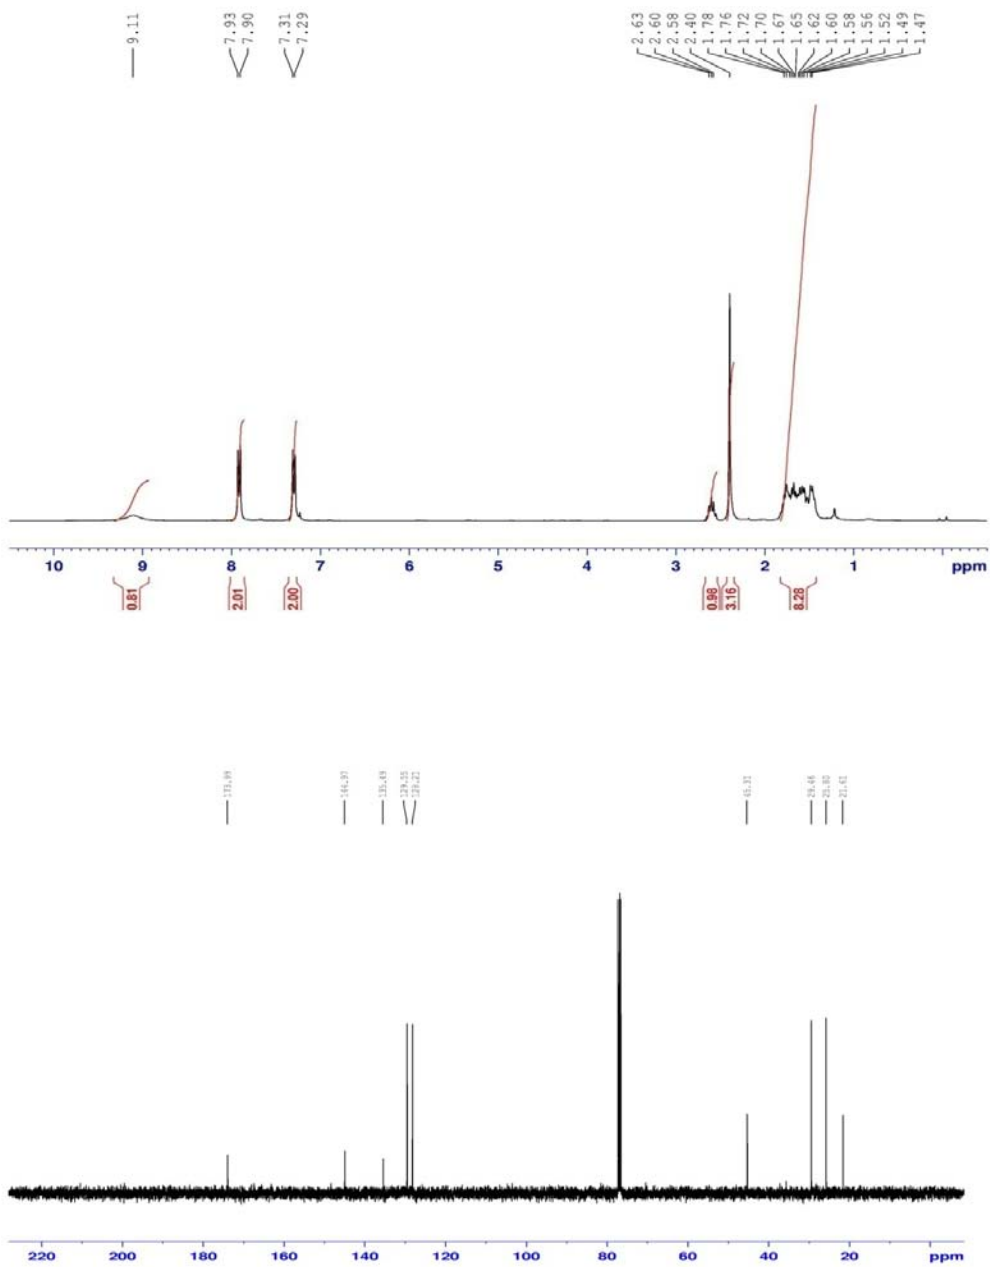

**Figure S8.**  $^1\text{H}$  and  $^{13}\text{C}$  NMR spectra of **2h**<sup>S7</sup>

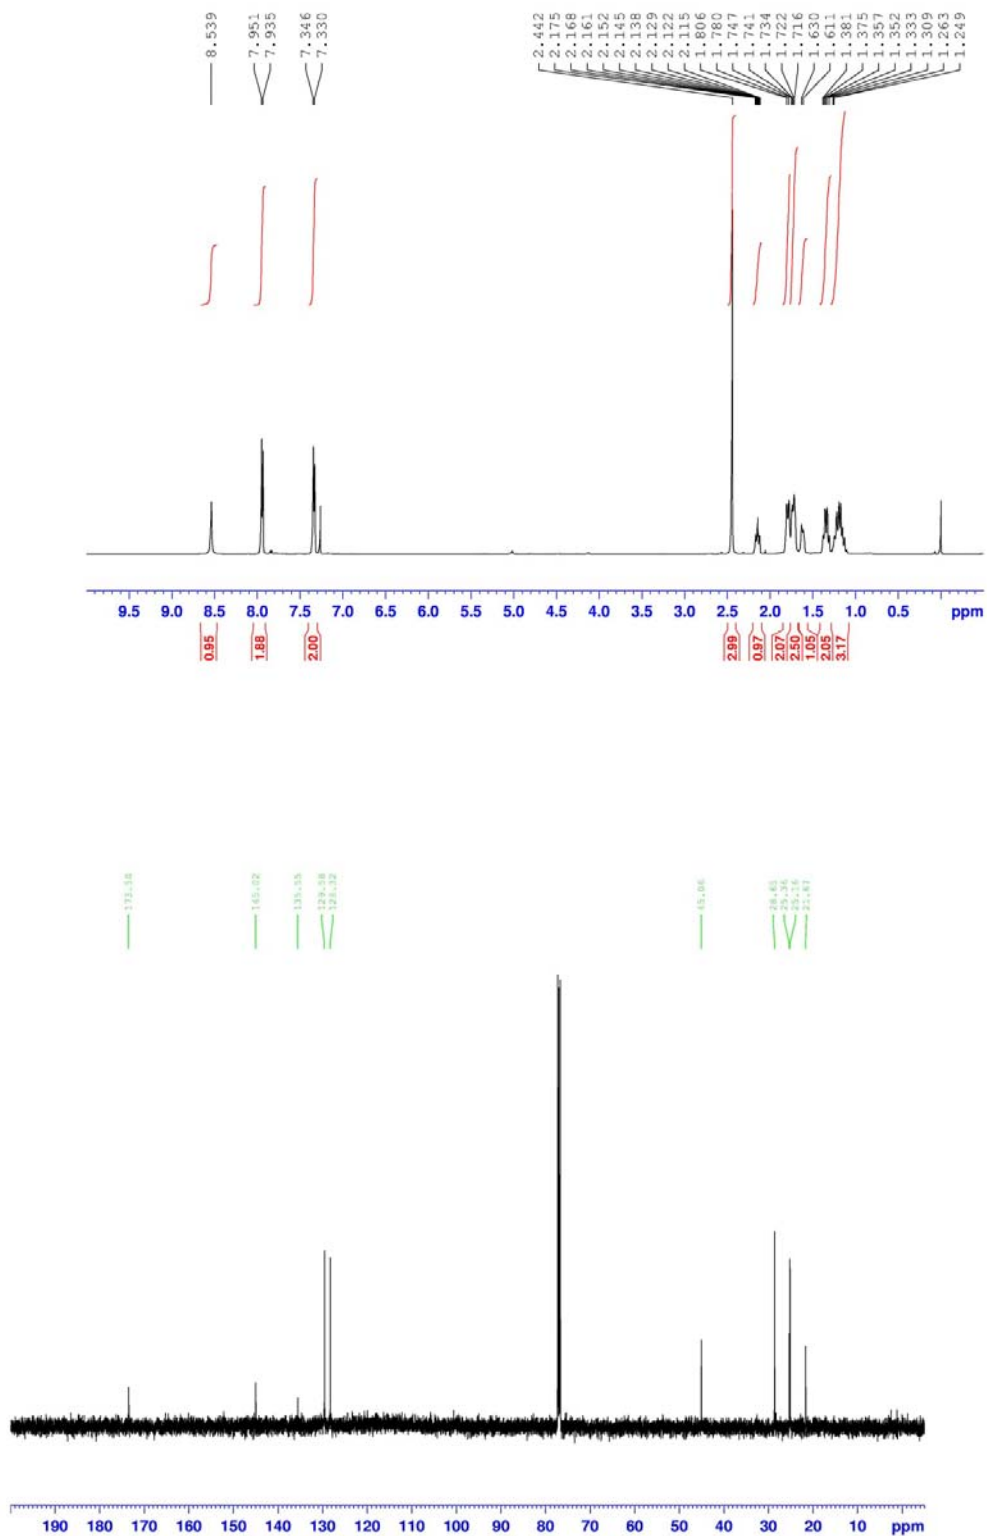

**Figure S9.**  $^1\text{H}$  and  $^{13}\text{C}$  NMR spectra of **2i**<sup>S7</sup>

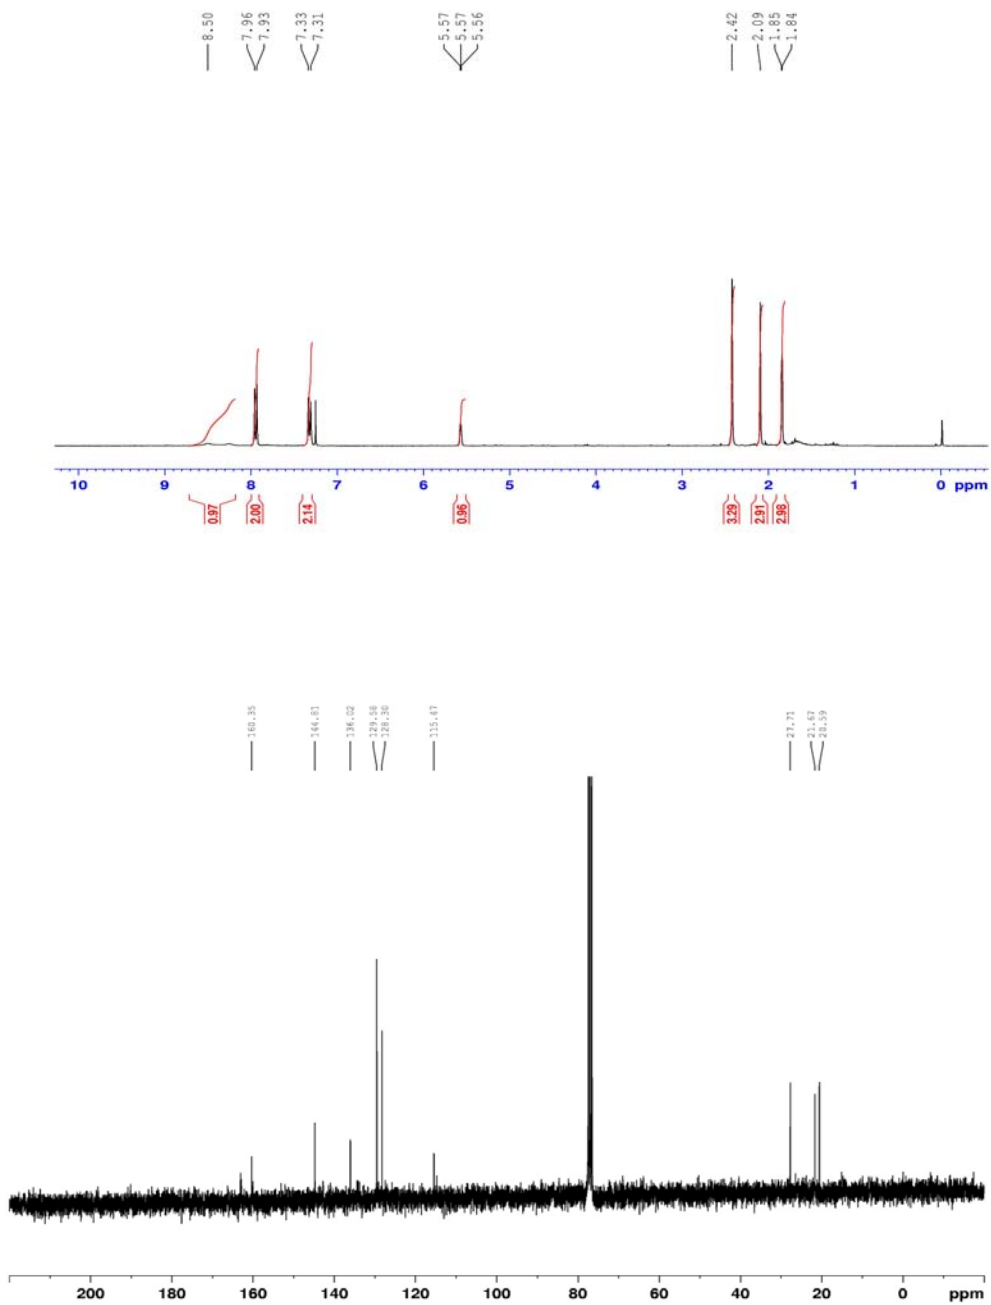

**Figure S10.**  $^1\text{H}$  and  $^{13}\text{C}$  NMR Spectra of **2j**<sup>S7</sup>

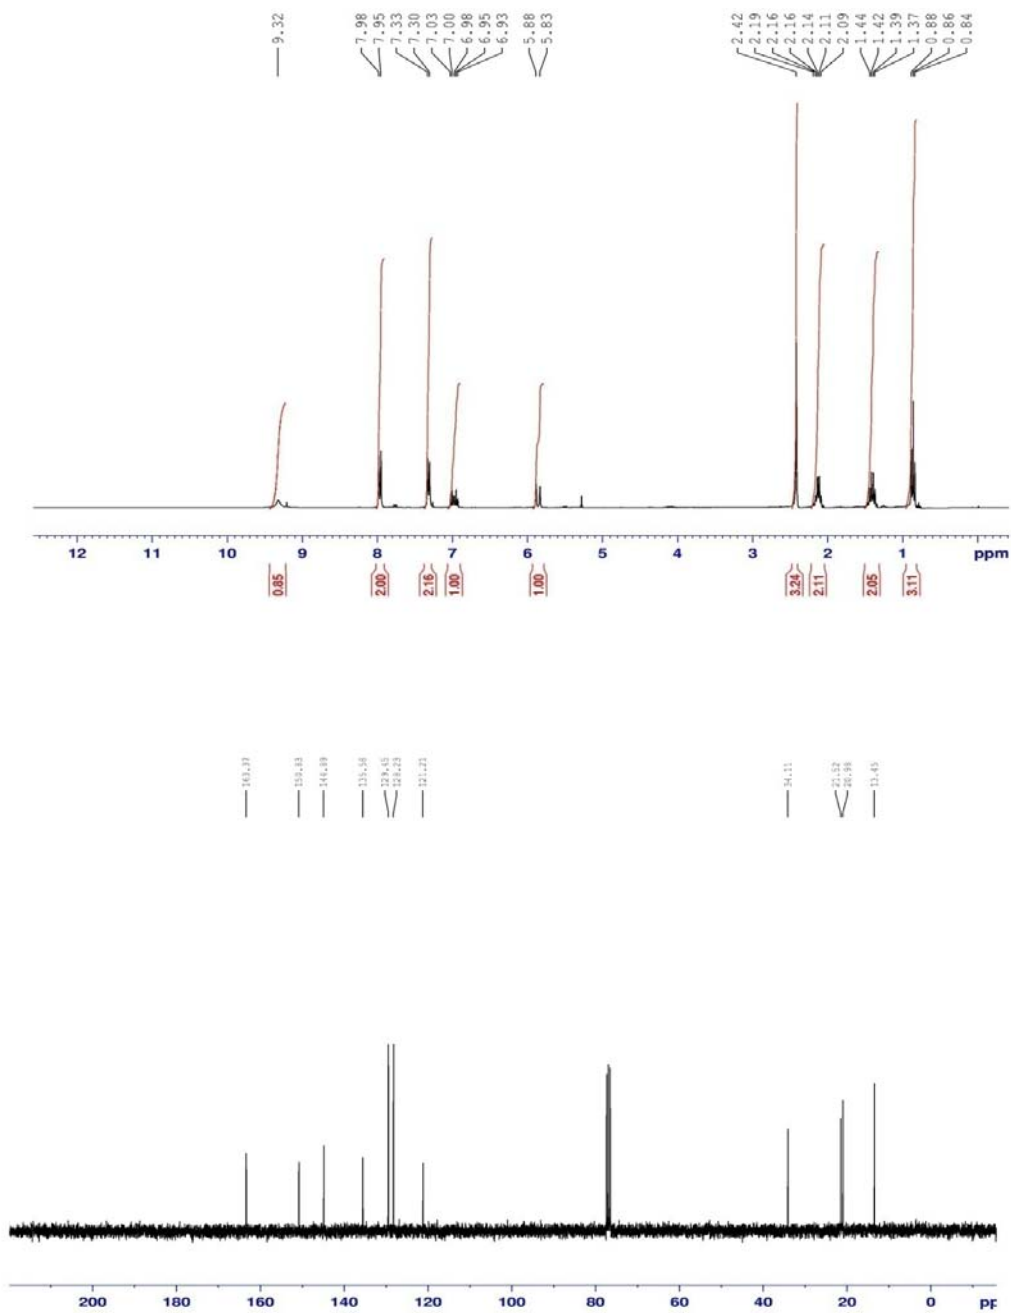

**Figure S11.**  $^1\text{H}$  and  $^{13}\text{C}$  NMR spectra of **2k**<sup>S7</sup>

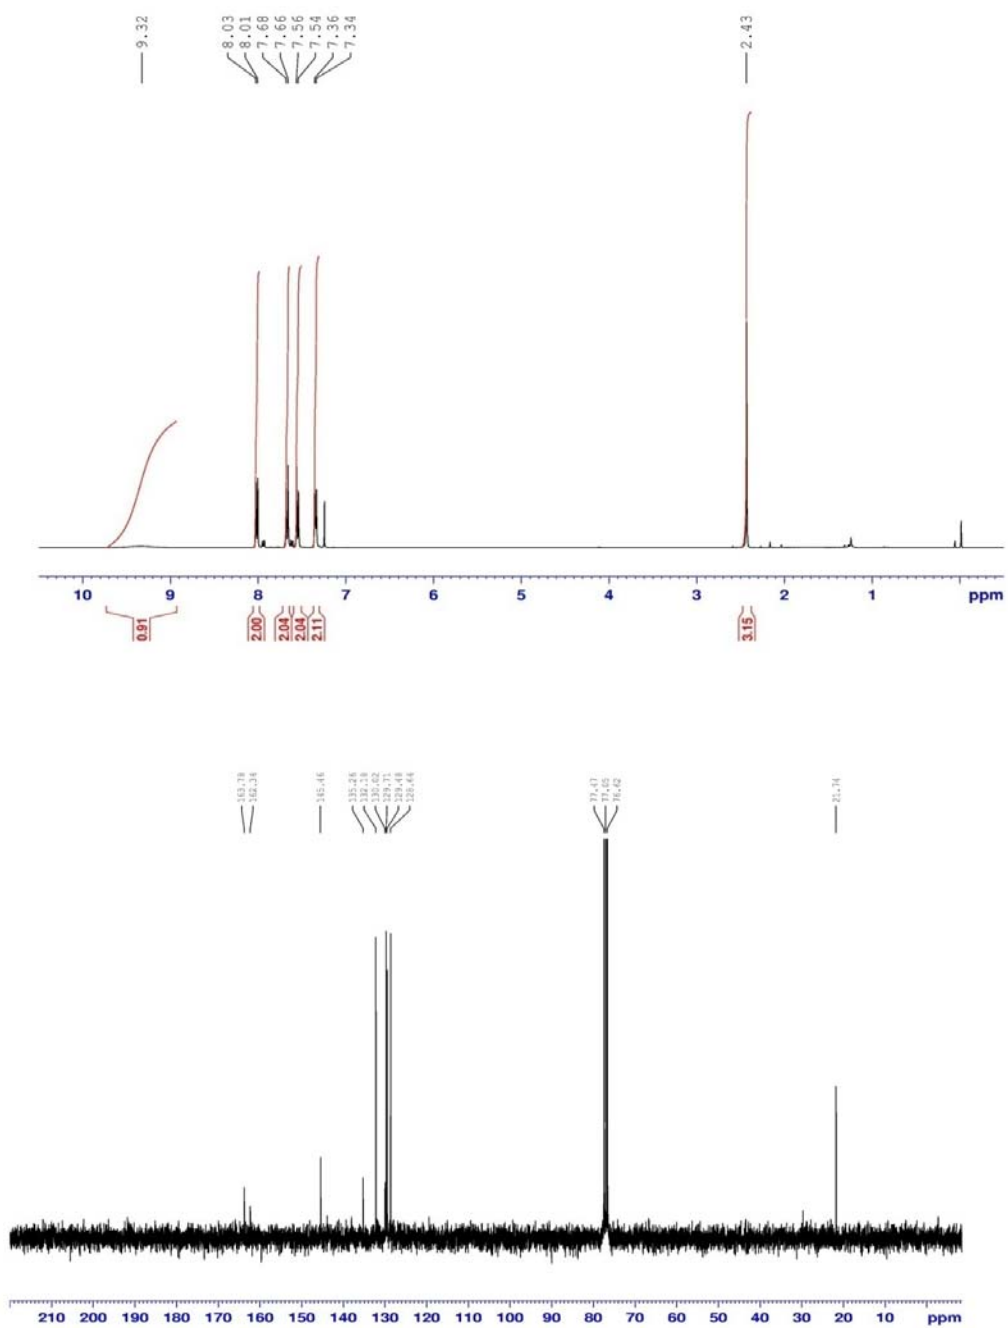

**Figure S12.**  $^1\text{H}$  and  $^{13}\text{C}$  NMR spectra of **21**<sup>S7</sup>

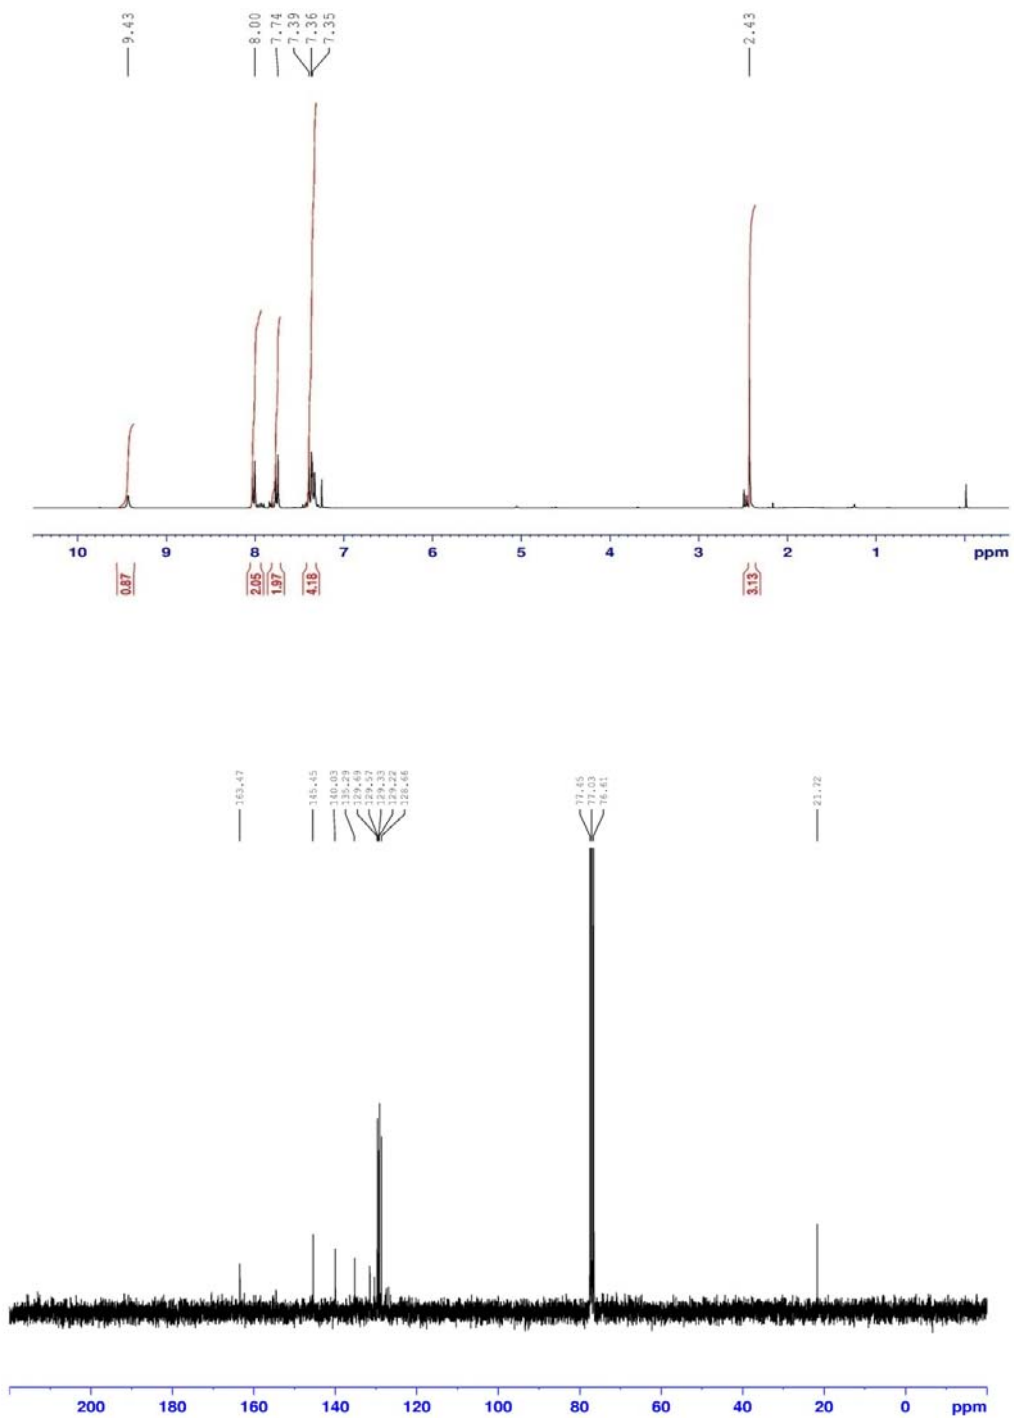

**Figure S13.**  $^1\text{H}$  and  $^{13}\text{C}$  NMR spectra of **2m**<sup>S7</sup>

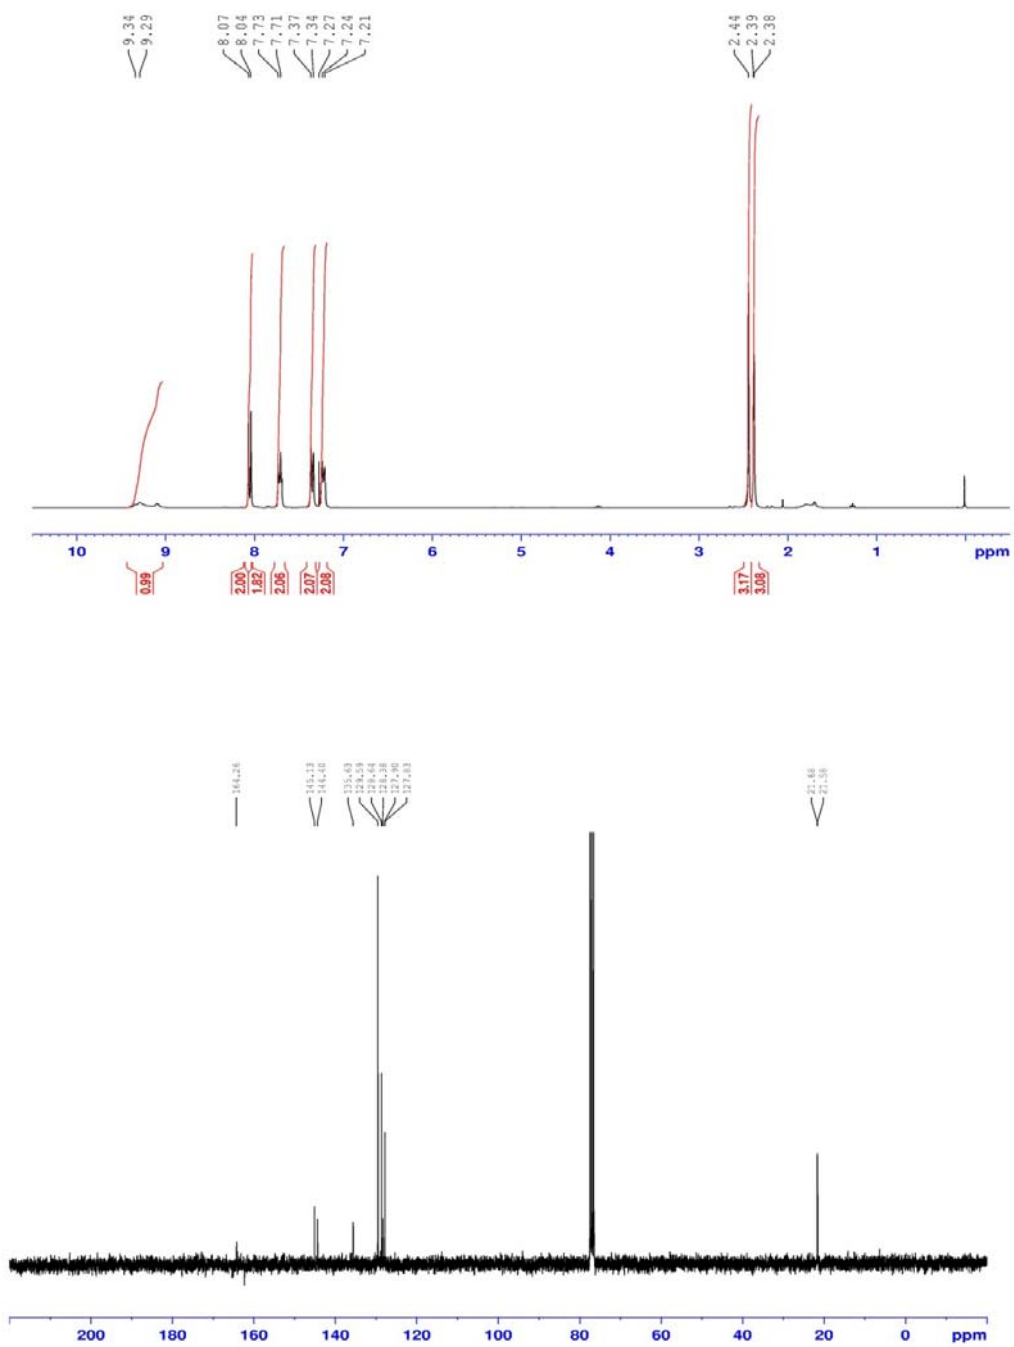

**Figure S14.**  $^1\text{H}$  and  $^{13}\text{C}$  NMR spectra of **2n**<sup>S7</sup>

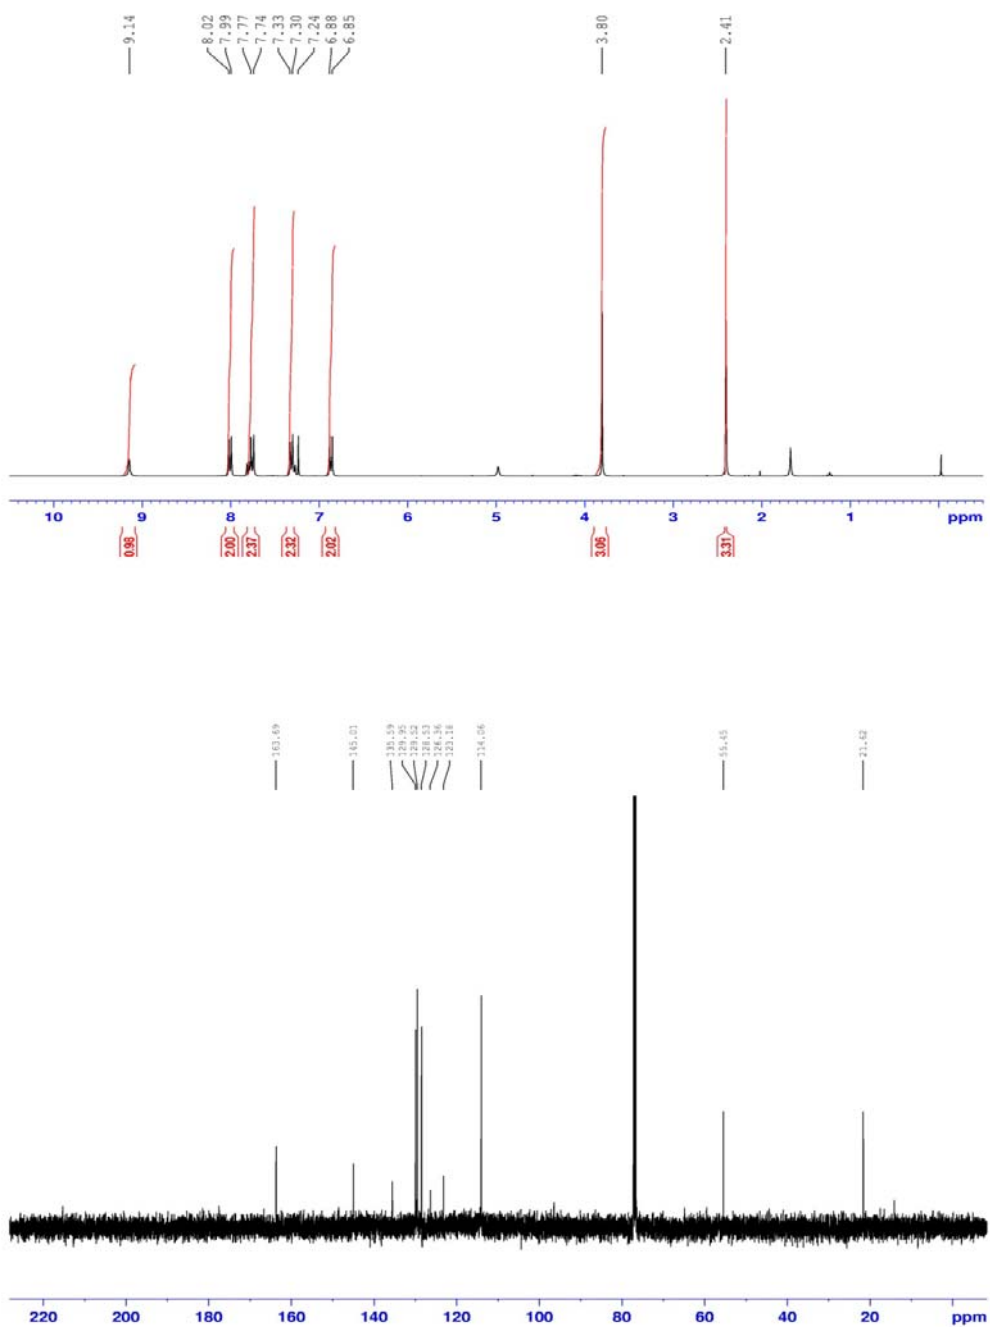



**Figure S15.**  $^1\text{H}$  and  $^{13}\text{C}$  NMR spectra of **2o**<sup>S7</sup>

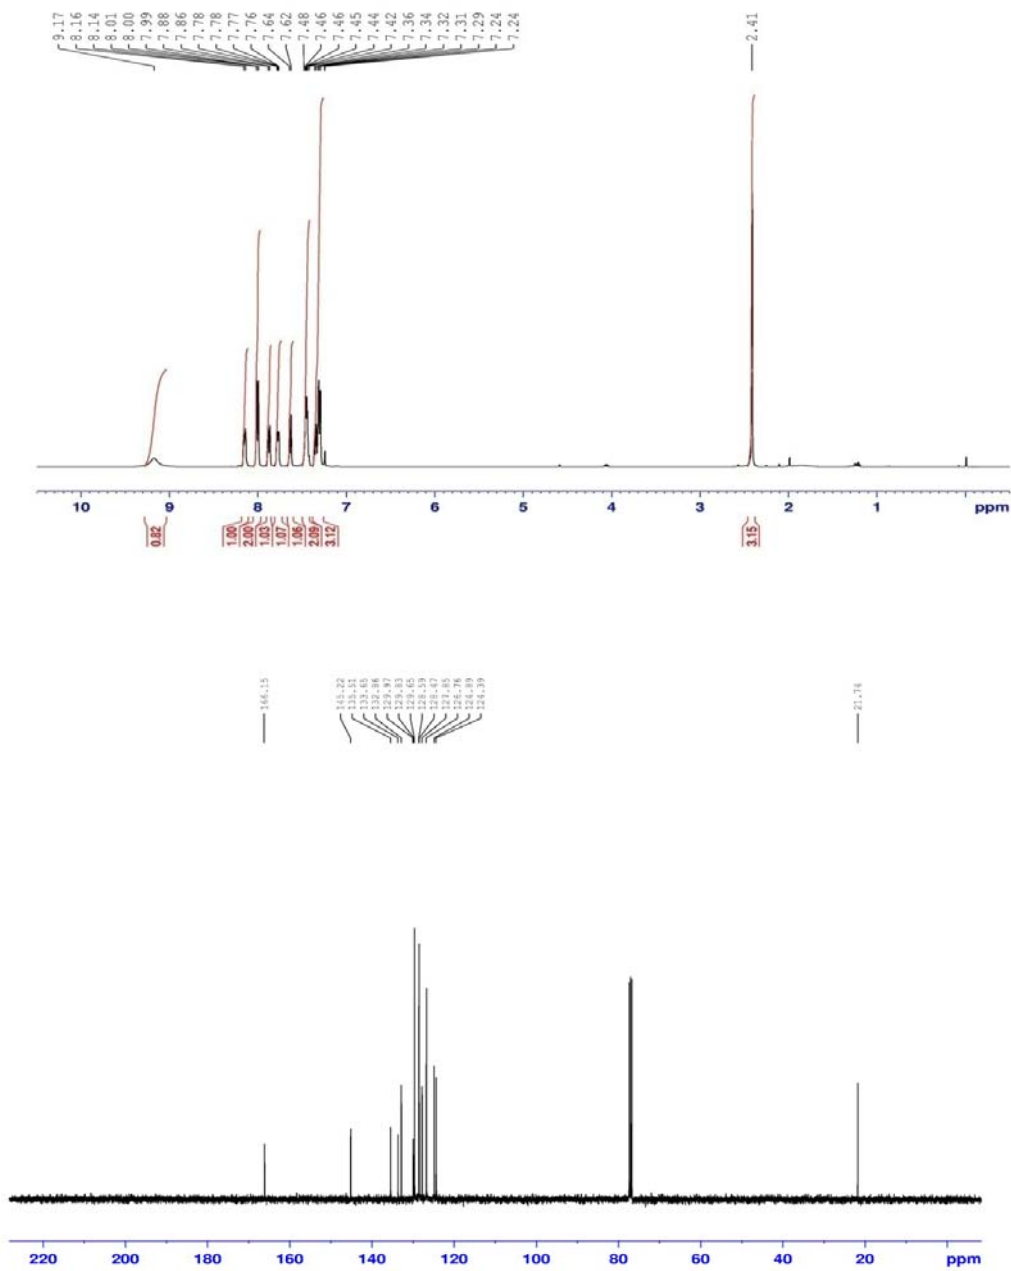

**Figure S16.**  $^1\text{H}$  and  $^{13}\text{C}$  NMR spectra of **2p**<sup>S7</sup>

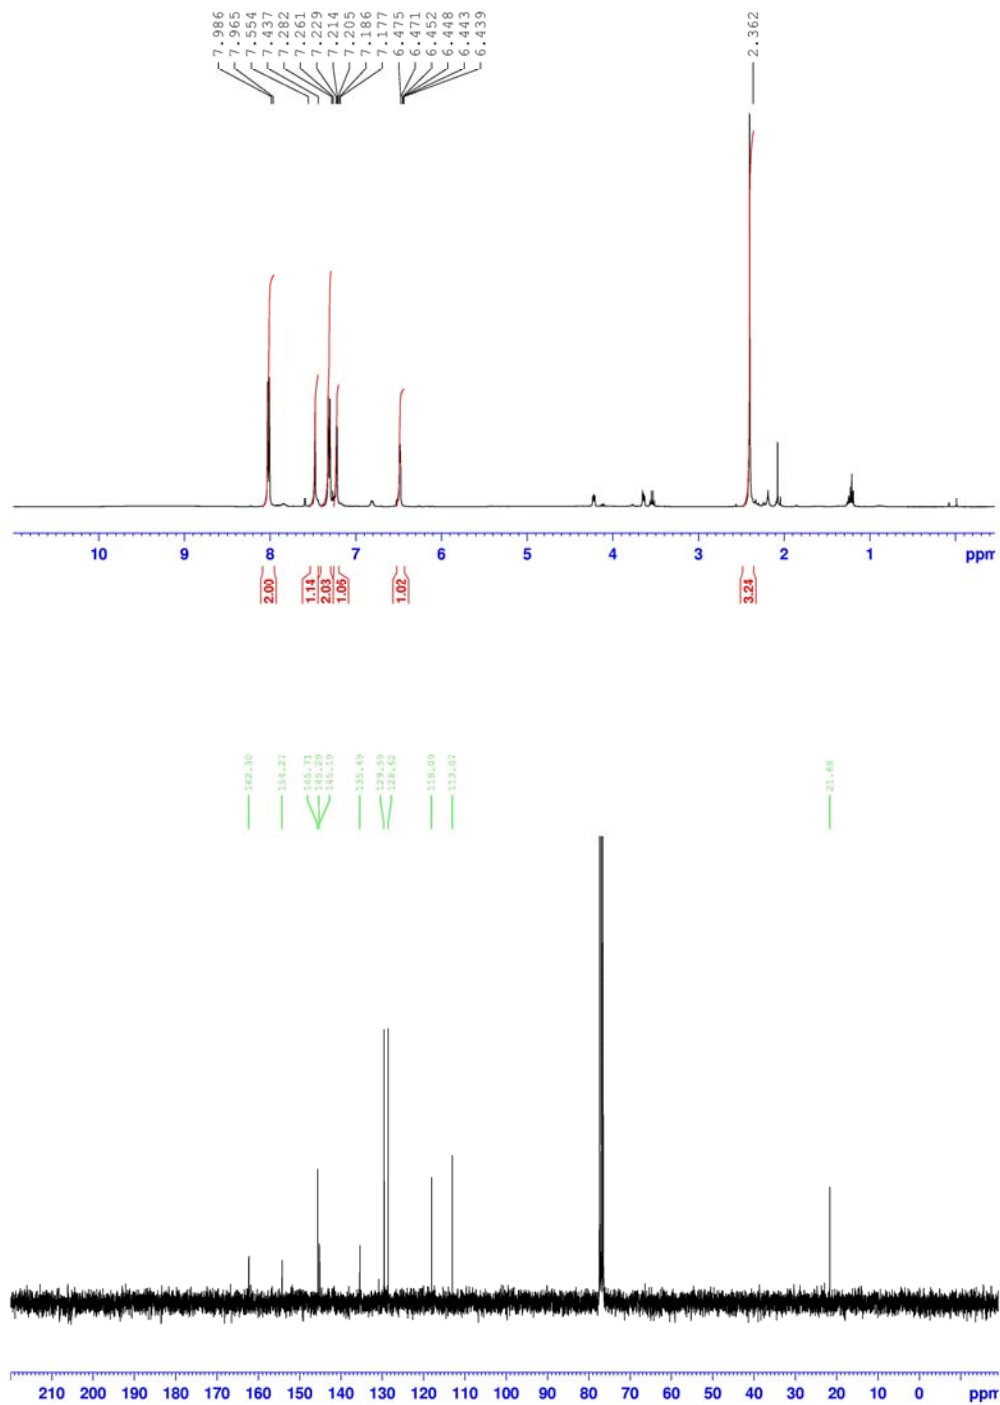

**Figure S18.**  $^1\text{H}$  and  $^{13}\text{C}$  NMR spectra of **3b**<sup>S4</sup>

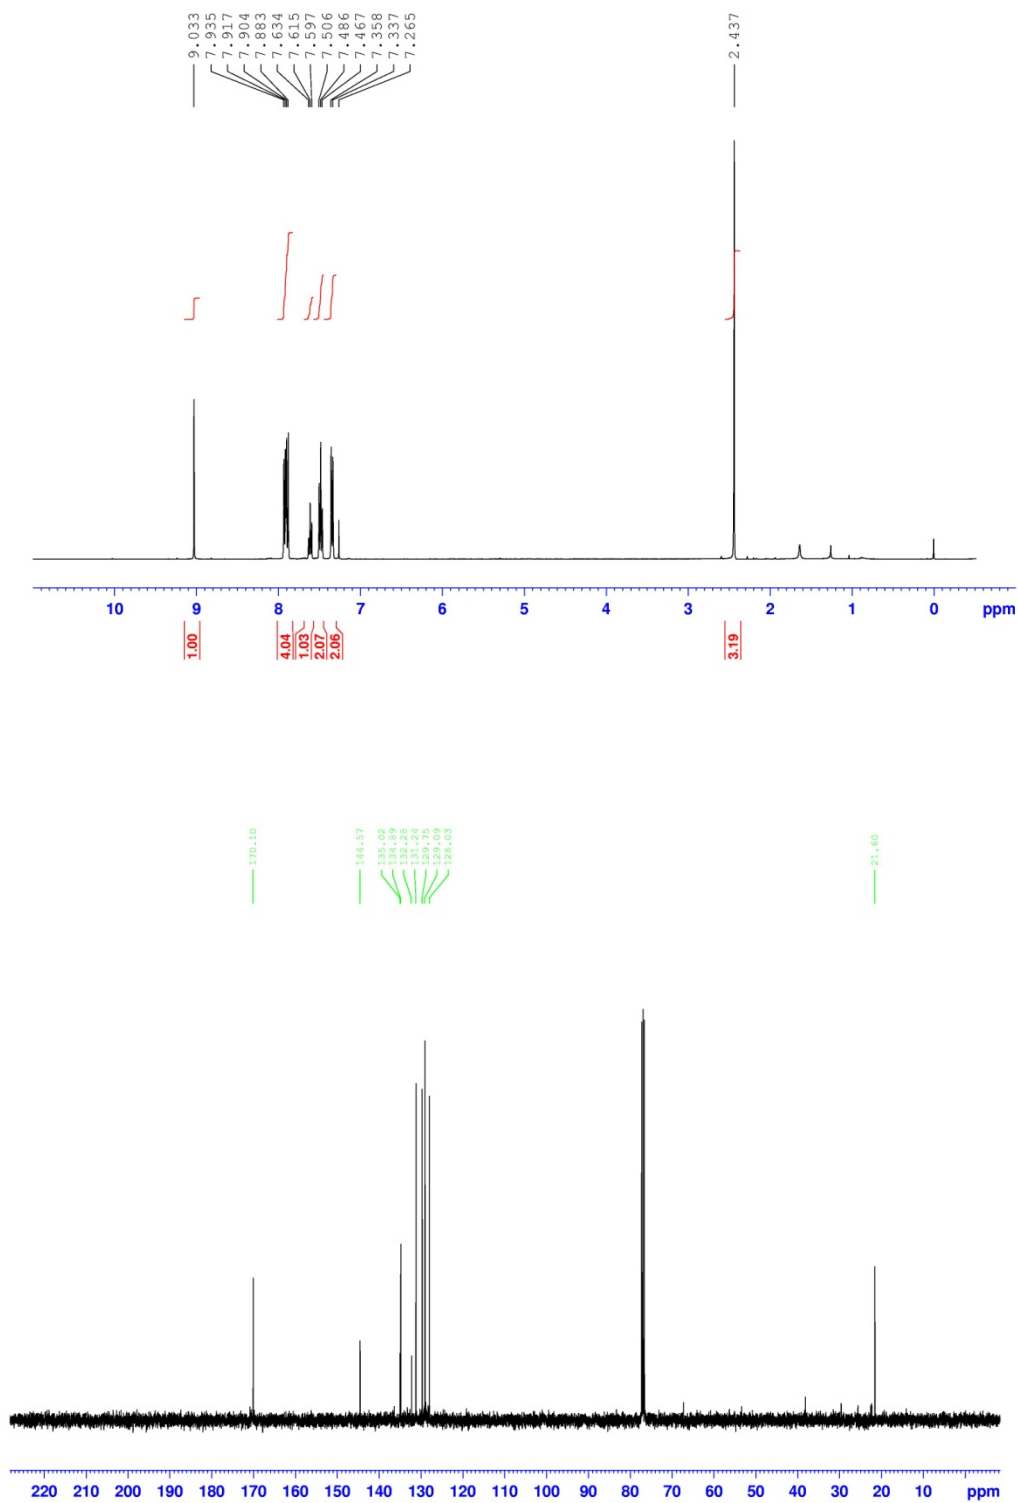

**Figure S19.**  $^1\text{H}$  and  $^{13}\text{C}$  NMR spectra of **4b**<sup>S5</sup>

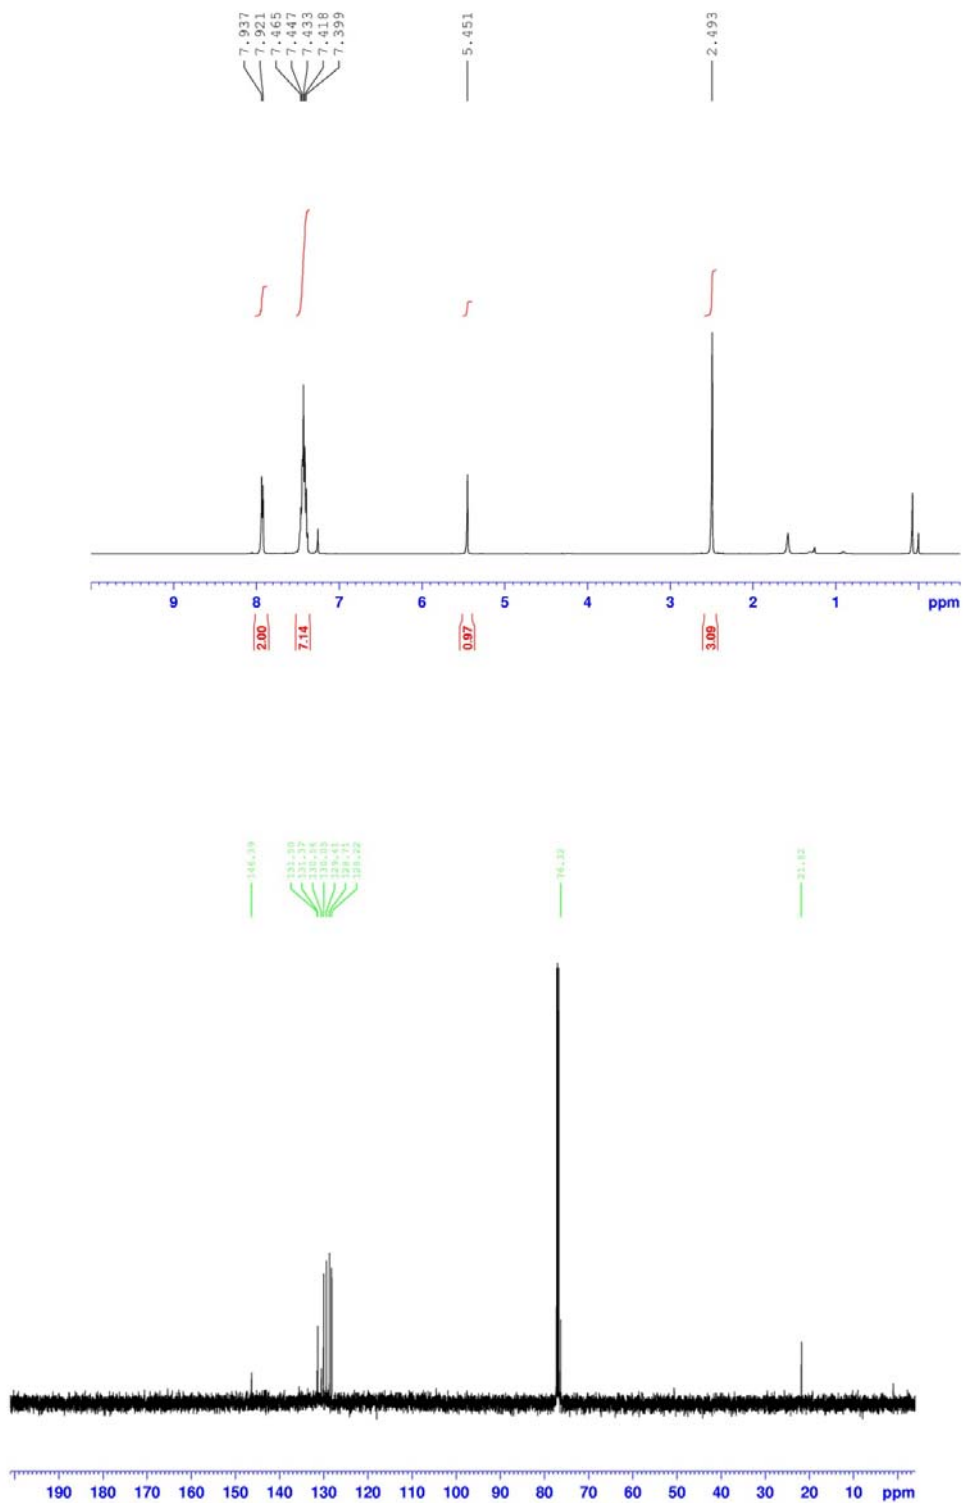

**Figure S20.**  $^1\text{H}$  and  $^{13}\text{C}$  NMR spectra of  $5^{\text{S6}}$

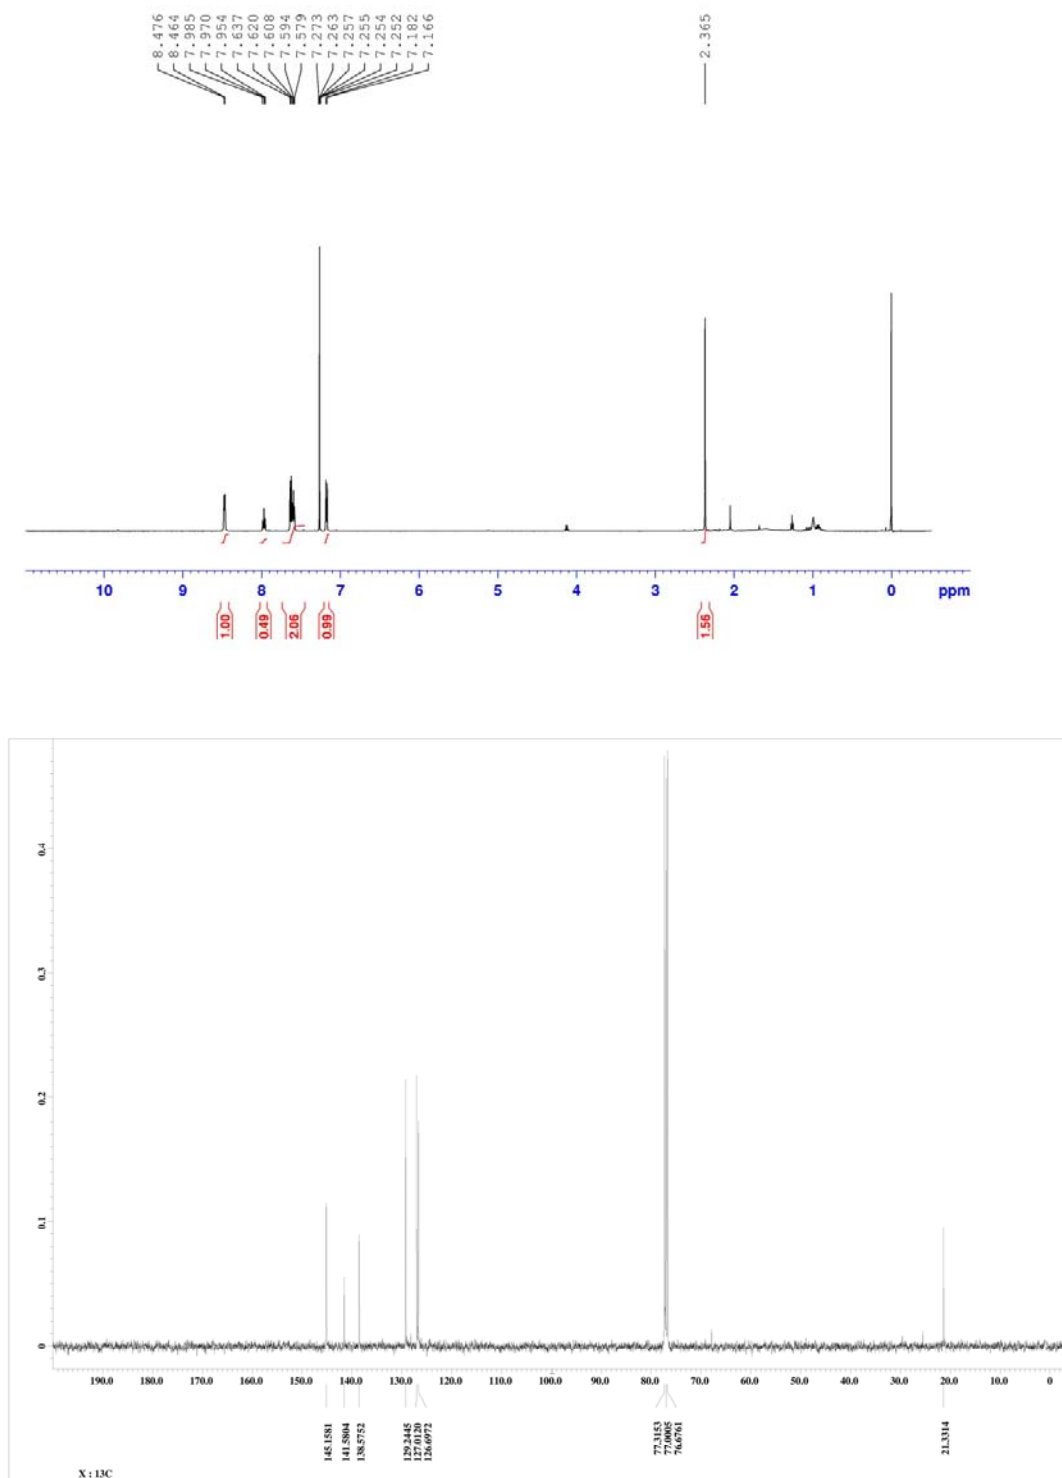

**Figure S21.**  $^{13}\text{C}$ -benzaldehyde in situ monitoring experiment at a) 0 h, b) 4 h, c) 10 h and d) 18h

a)

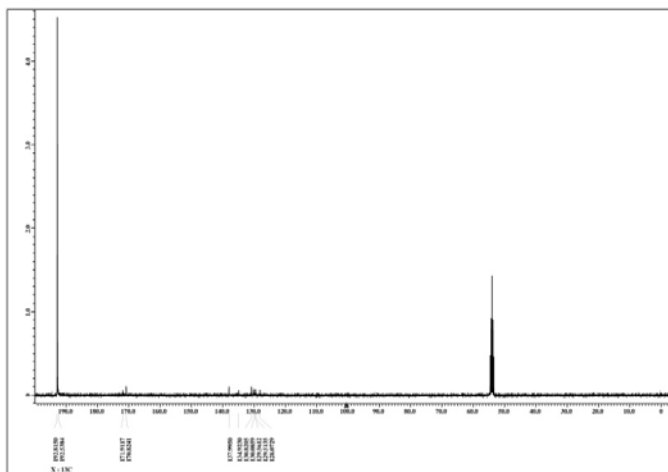

b)

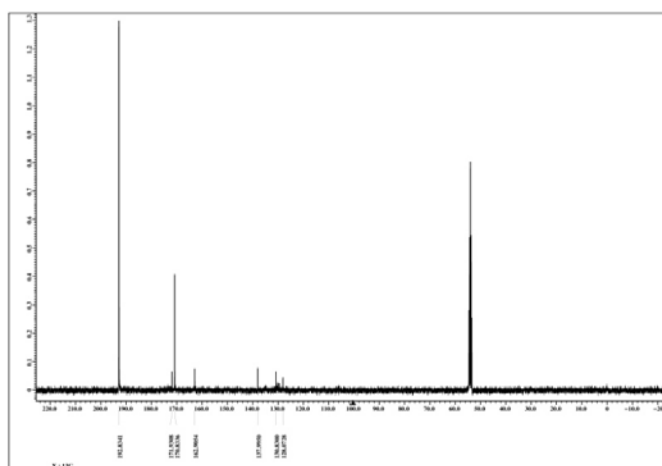

c)

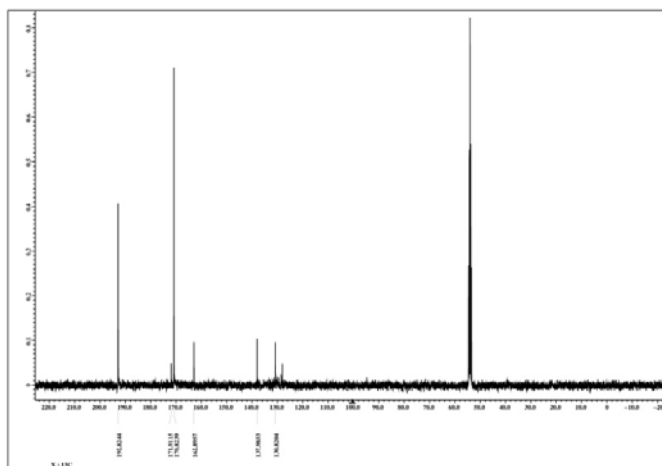

d)

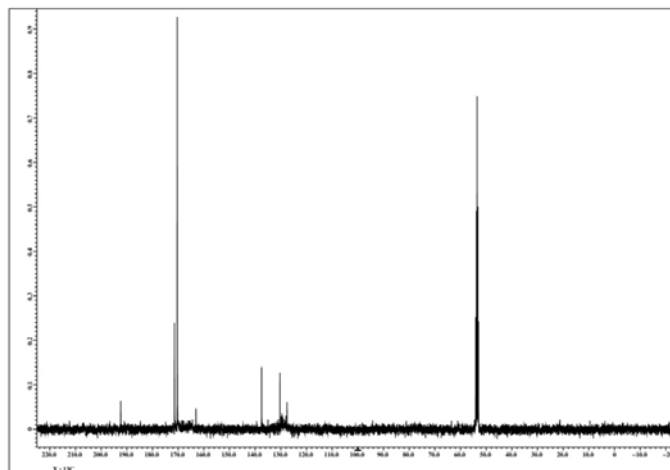

**Figure S22.** Aromatic region in the  $^1\text{H}$  NMR spectrum of the crude product  $N,N$ - $d_1$ -tosylbenzamide obtained from CuI-catalysed amidation of benzaldehyde- $\alpha$ - $d_1$  in  $\text{CH}_2\text{Cl}_2$  solution<sup>S7</sup>

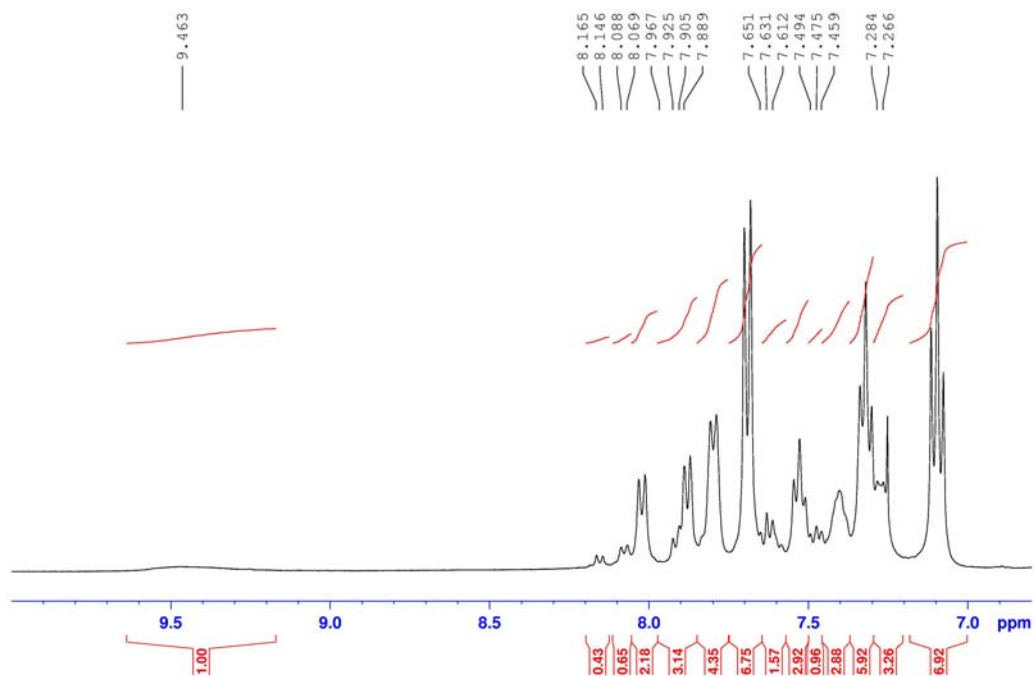



**Figure S23.** Aromatic region in the  $^1\text{H}$  NMR spectrum of the crude product  $N,N$ - $d_1$ -tosylbenzamide obtained from CuI-catalyzed amidation of benzaldehyde- $\alpha$ - $d_1$  in  $\text{CD}_2\text{Cl}_2$  solution<sup>S7</sup>

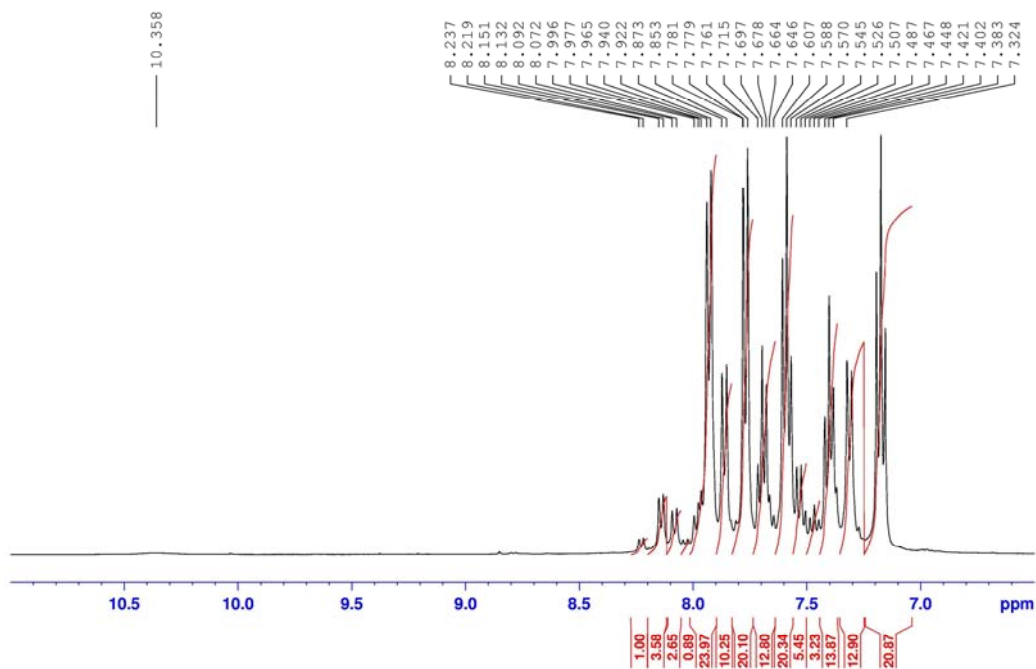

**Figure S24.** Aromatic region in the  $^1\text{H}$  NMR spectrum of the crude product  $N,N$ - $d_1$ -tosylbenzamide obtained from CuI-catalyzed amidation of benzaldehyde- $\alpha$ - $d_1$  in  $\text{CD}_2\text{Cl}_2$  solution after treatment with one drop of  $\text{H}_2\text{O}$ <sup>S7</sup>

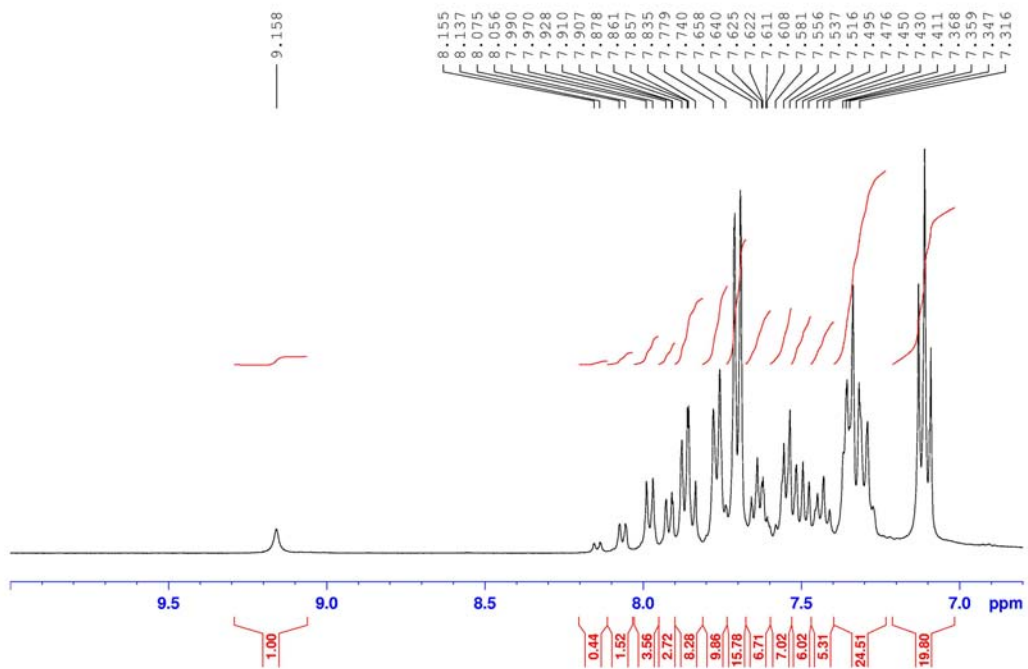

**Figure S25.** Mass Spectrum of Kinetic Isotope Experiment Studies

Mobile phase = 0.1% formic acid in 95%H<sub>2</sub>O: 5%MeCN

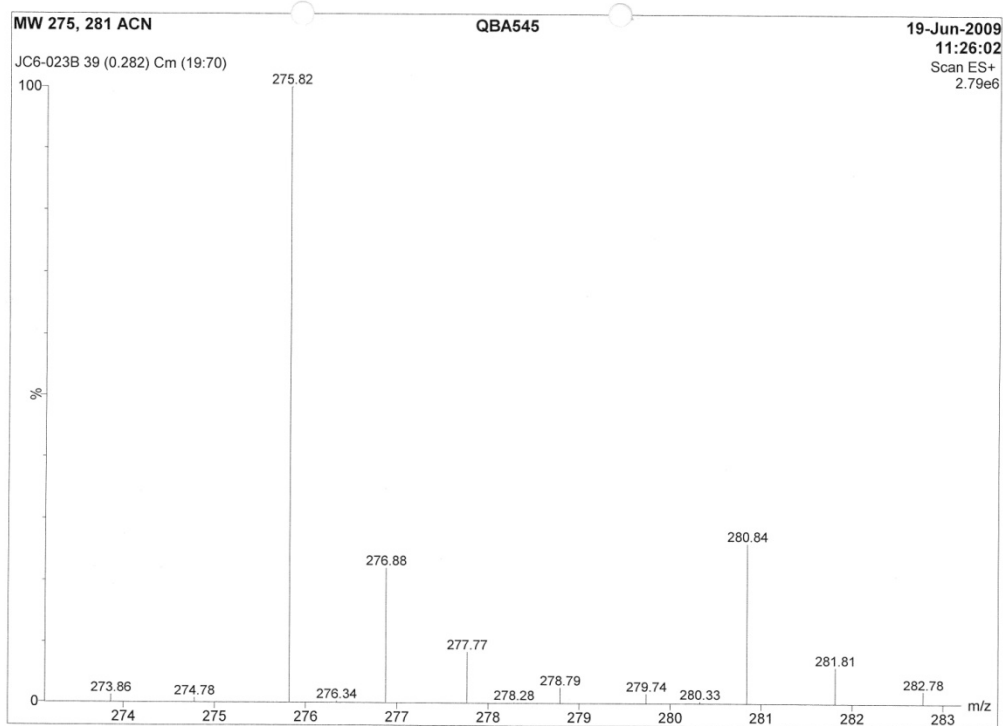

## References

- S1. Y. Yamada, T. Yamamoto and M. Okawara, *Chem. Lett.*, 1975, 361.
- S2. B. J. E. Reich, A. K. Justice, B. T. Beckstead, J. H. Reibenspies and S. A. Miller, *J. Org. Chem.*, 2004, **69**, 1357.
- S3. P. Dauban, L. Saniere, A. Tarrade, R. H. Dodd, *J. Am. Chem. Soc.*, 2001, **123**, 7701.
- S4. a) C. Palomo, M. Oiarbide, Halder, R.; Laso, A., Lopez, R. *Angew. Chem., Int. Ed.* 2006, **45**, 117; b) K. Y. Lee, C. G. Lee and J. N. Kim, *Tetrahedron Lett.* 2003, **33**, 1231.
- S5. J. L. G. Ruano, J. Aleman, C. Fajardo and A. Parra, *Org. Lett.*, 2005, **7**, 5493.
- S6. Y. Jiang, G.-C. Zhou, G.-L. He, L. He, J.-L. Li and S.-L. Zheng, *Synthesis*, 2007, 1459.
- S7. a) J. W. W. Chang and P. W. H. Chan, *Angew. Chem. Int. Ed.*, 2008, **47**, 1138; b) J. Chan, K. D. Baucom and J. A. Murry, *J. Am. Chem. Soc.*, 2007, **129**, 14106.
